# Supplementary material for: Efficacy and morbidity of biodegradable versus titanium osteosyntheses in orthognathic surgery: A systematic review with meta‐analysis and trial sequential analysis
Source: PubMed Central journal article supplement (PMC8596673; doi:10.1111/eos.12800), 2021-06-15
Supplement: EOS-129-0-s001.pdf [file EOS-129-0-s001.pdf]

# SUPPORTING INFORMATION

**Efficacy and morbidity of biodegradable versus titanium osteosyntheses in orthognathic surgery: a systematic review with meta-analysis and trial sequential analysis**

BARZI GAREB, NICO B. VAN BAKELEN, PIETER U. DIJKSTRA, ARJAN VISSINK,  
RUUD R.M. BOS, BAUCKE VAN MINNEN

University of Groningen, University Medical Center Groningen, Groningen, The  
Netherlands

### **Supplementary Tables:**

**Table S1:** Electronic databases with the corresponding search details (11 February 2021).

**Table S2:** Endpoints divided into five time units.

**Table S3:** List with contacted authors of original articles.

**Table S4:** Excluded articles with reasons for exclusion after full-text screening.

**Table S5:** All assessed endpoints of the included studies, except skeletal stability.

**Table S6:** Operative displacement and relapse.

**Table S7:** Results of univariable meta-regression analyses to analyze the effect of risk of bias items on the log risk ratio of symptomatic device removal using a random effects model.

**Table S8:** Input and results of the trial sequential analyses using the random-effects (DerSimonian-Laird) model with the corresponding interpretations.

### **Supplementary Figures:**

**Figure S1:** Example graph with explanation of the trial sequential analysis.

**Figure S2:** Forest plot of the endpoint operative time in minutes. *SMD, standardised mean difference; 95%-CI, 95% confidence interval.*

**Figure S3:** Forest plot of the endpoint swelling (<4 weeks follow-up) stratified by study design. *RCT, randomised controlled trials; Prosp. CS, prospective cohort studies; RR, risk ratio; 95%-CI, 95% confidence interval.*

**Figure S4:** Forest plot of the endpoint dehiscence (<4 weeks follow-up) stratified by study design. *RCT, randomised controlled trials; Retros. CS, retrospective cohort studies; RR, risk ratio; 95%-CI, 95% confidence interval.*

**Figure S5:** Forest plot of the endpoint pain (6-12 weeks follow-up) stratified by study design. *RCT, randomised controlled trials; SMD, standardised mean difference; 95%-CI, 95% confidence interval.*

**Figure S6:** Forest plot of the endpoint pain (>12 weeks follow-up) stratified by study design. *RCT, randomised controlled trials; SMD, standardised mean difference; 95%-CI, 95% confidence interval.*

**Figure S7:** Forest plot of the endpoint maximum mouth opening (>12 weeks follow-up) stratified by study design. *RCT, randomised controlled trials; SMD, standardised mean difference; 95%-CI, 95% confidence interval.*

**Figure S8:** Forest plot of the endpoint symptomatic device removal (overall follow-up) of studies stratified maxillary, mandibular, and bimaxillary osteotomies. *RR, risk ratio; 95%-CI, 95% confidence interval.*

**Figure S9:** Forest plot of the endpoint symptomatic device removal (overall follow-up) of studies including osteosynthesis by plates and screws versus only screws. *RR, risk ratio; 95%-CI, 95% confidence interval.*

**Figure S10:** Forest plot of the endpoint symptomatic device removal (overall follow-up) stratified by  $\leq 1$ -year and  $>1$ -year follow-up. *RR, risk ratio; 95%-CI, 95% confidence interval.*

**Figure S11:** Forest plot of the endpoint maxillary horizontal relapse after maxillary advancement stratified by study design (overall follow-up). *RCT, randomised controlled trials; Retros. CS, retrospective cohort studies; SMD, standardised mean difference; 95%-CI, 95% confidence interval.*

**Figure S12:** Forest plot of the endpoint maxillary angular relapse after maxillary advancement stratified by study design (overall follow-up). *Retros. CS, retrospective cohort studies; SMD, standardised mean difference; 95%-CI, 95% confidence interval.*

**Figure S13:** Forest plot of the endpoint maxillary horizontal relapse after maxillary setback stratified by study design (overall follow-up). *Retros. CS, retrospective cohort studies; SMD, standardised mean difference; 95%-CI, 95% confidence interval.*

**Figure S14:** Forest plot of the endpoint maxillary vertical relapse after maxillary impaction stratified by study design (overall follow-up). *RCT, randomised controlled trials; Retros. CS, retrospective cohort studies; SMD, standardised mean difference; 95%-CI, 95% confidence interval.*

**Figure S15:** Forest plot of the endpoint maxillary vertical relapse after maxillary elongation stratified by study design (overall follow-up). *Retros. CS, retrospective cohort studies; SMD, standardised mean difference; 95%-CI, 95% confidence interval.*

**Figure S16:** Forest plot of the endpoint mandibular horizontal relapse after mandibular advancement stratified by study design (overall follow-up). *Prosp. CS, prospective cohort studies; Retros. CS, retrospective cohort studies; SMD, standardised mean difference; 95%-CI, 95% confidence interval.*

**Figure S17:** Forest plot of the endpoint mandibular horizontal relapse after mandibular setback stratified by study design (overall follow-up). *RCT, randomised controlled trials; Retros. CS, retrospective cohort studies; SMD, standardised mean difference; 95%-CI, 95% confidence interval.*

**Figure S18:** Forest plot of the endpoint mandibular horizontal relapse after mandibular setback of studies including osteosynthesis by plates and screws versus only screws (overall follow-up). *SMD, standardised mean difference; 95%-CI, 95% confidence interval.*

**Figure S19:** Forest plot of the endpoint mandibular vertical relapse after mandibular setback stratified by study design (overall follow-up). *RCT, randomised controlled trials; Retros. CS, retrospective cohort studies; SMD, standardised mean difference; 95%-CI, 95% confidence interval.*

**Figure S20:** Forest plot of the endpoint mandibular vertical relapse after mandibular setback of studies including osteosynthesis by plates and screws versus only screws (overall follow-up). *SMD, standardised mean difference; 95%-CI, 95% confidence interval.*

**Figure S21:** Forest plot of the endpoint mandibular angular relapse after mandibular clockwise rotation stratified by study design (overall follow-up). *Retrosp. CS, retrospective cohort studies; SMD, standardised mean difference; 95%-CI, 95% confidence interval.*

**Figure S22:** Forest plot of the endpoint mandibular angular relapse after mandibular counter clockwise rotation stratified by study design (overall follow-up). *RCT, randomised controlled trials; Retrosp. CS, retrospective cohort studies; SMD, standardised mean difference; 95%-CI, 95% confidence interval.*

**Figure S23:** Sensitivity analysis with summary risk ratios for all pooled outcomes according to the inclusion of all randomized controlled trials and non-high-risk-of-bias RCTs only. *RCT, randomised controlled trials; RR, risk ratio; 95%-CI, 95% confidence interval.*

**Figure S24:** Sensitivity analysis with summary standardized mean differences for all pooled outcomes according to the inclusion of all randomized controlled trials and non-high-risk-of-bias RCTs only. *RCT, randomised controlled trials; SMD, standardised mean difference; 95%-CI, 95% confidence interval.*

**Table S1:** Electronic databases with the corresponding search details (11 February 2021).

| Database                                                                                                                         | Search terms                                                                                                                                                                                                                                                                                                                                                                                                                                                                                                                                                                                                                                                                                                                                                                                                                                                                                                                                                                                                                                                                                                                                                                                                                                                                                                                                                                                                                                                                                                                                                          | Hits |
|----------------------------------------------------------------------------------------------------------------------------------|-----------------------------------------------------------------------------------------------------------------------------------------------------------------------------------------------------------------------------------------------------------------------------------------------------------------------------------------------------------------------------------------------------------------------------------------------------------------------------------------------------------------------------------------------------------------------------------------------------------------------------------------------------------------------------------------------------------------------------------------------------------------------------------------------------------------------------------------------------------------------------------------------------------------------------------------------------------------------------------------------------------------------------------------------------------------------------------------------------------------------------------------------------------------------------------------------------------------------------------------------------------------------------------------------------------------------------------------------------------------------------------------------------------------------------------------------------------------------------------------------------------------------------------------------------------------------|------|
| PubMed<br>( <a href="http://www.ncbi.nlm.nih.gov/pubmed/">http://www.ncbi.nlm.nih.gov/pubmed/</a> )                              | <p>("Orthognathic Surgery"[Mesh] OR "Orthognathic Surgical Procedures"[Mesh] OR "Osteotomy, Le Fort"[Mesh] OR "Osteotomy, Sagittal Split Ramus"[Mesh] OR "Mandibular Advancement"[Mesh] OR "Facial Bones/surgery"[Mesh] OR "Facial Injuries"[Mesh:NoExp] OR "Maxillofacial Injuries"[Mesh] OR "Maxillofacial Abnormalities"[Mesh] OR "Malocclusion/surgery"[Mesh] OR maxill*[tiab] OR mandib*[tiab] OR jaw[tiab] OR orthognat*[tiab] OR craniofac*[tiab] OR craniomaxil*[tiab] OR retrognat*[tiab] OR orthodont*[tiab] OR zygom*[tiab] OR split ramus[tiab] OR "Facial injuries"[MeSH] OR ((orbit*[tiab] OR facial[tiab] OR face[tiab] OR nose[tiab] OR nasal[tiab]) AND (fract*[tiab] OR injur*[tiab] OR reconstruct*[tiab])))</p> <p>AND ("Absorbable Implants"[Mesh] OR "Internal Fixators"[Mesh] OR "Fracture Fixation, Internal"[Mesh] OR plate*[tiab] OR screw*[tiab] OR miniscrew*[tiab] OR miniplate*[tiab] OR implant*[tiab] OR osteosynth*[tiab] OR osseointegrat*[tiab] OR osteofixat*[tiab] OR osteotom*[tiab] OR fixat*[tiab])</p> <p>AND ("Absorbable Implants"[Mesh] OR bioresorb*[tiab] OR biodegrad*[tiab] OR bioabsorb*[tiab] OR bioadsorb*[tiab] OR absorb*[tiab] OR resorb*[tiab] OR adsorb*[tiab] OR "Lactic acid"[MeSH] OR lactic acid[tiab] OR "Polyglycolic acid"[MeSH] OR polyglycolic acid[tiab] OR "Hydroxyapatites"[MeSH] OR hydroxyapatite[tiab] OR biologically inert[tiab])</p> <p>NOT ("Case Reports" [Publication Type] OR "Review" [Publication Type])</p> <p>NOT ("Animals"[Mesh] NOT "Humans"[Mesh])</p>                          | 2535 |
| EMBASE<br>( <a href="http://www.embase.com/home">http://www.embase.com/home</a> )                                                | <p>('craniofacial surgery'/de OR 'cranioplasty'/exp OR 'face surgery'/de OR 'maxillofacial surgery'/exp OR 'nose surgery'/exp OR 'orthognathic surgery'/exp OR 'orbit reconstruction'/exp OR 'maxillofacial injury'/de OR 'skull injury'/exp OR 'skull'/exp OR 'face fracture'/exp OR 'skull malformation'/exp/dm_su OR 'craniofacial malformation'/exp OR 'face malformation'/dm_su OR 'malocclusion'/exp/dm_su OR (maxill* OR mandib* OR jaw OR orthognat* OR craniofac* OR craniomaxil* OR retrognat* OR orthodont* OR zygom* OR 'split ramus' OR ((orbit* OR facial OR face OR nose OR nasal) AND (fract* OR injur* OR reconstruct*)):ab,ti)</p> <p>AND ('bone plate'/exp OR 'bone screw'/exp OR 'internal fixator'/exp OR 'fracture fixation'/exp OR 'bioabsorbable screw'/exp OR 'biodegradable screw'/exp OR 'biodegradable implant'/exp OR 'orthopedic fixation device'/de OR (plate* OR screw* OR miniscrew* OR miniplate* OR implant* OR osteosynth* OR osseointegrat* OR osteofixat* OR osteotom* OR fixat*):ab,ti)</p> <p>AND ('biodegradable implant'/exp OR 'bioabsorbable screw'/exp OR 'biodegradable screw'/exp OR 'lactic acid'/exp/mj OR 'polyglycolic acid'/exp/mj OR 'hydroxyapatite'/exp/mj OR 'biosorbent'/exp OR (bioresorb* OR biodegrad* OR bioabsorb* OR bioadsorb* OR absorb* OR resorb* OR adsorb* OR 'lactic acid' OR 'polyglycolic acid' OR hydroxyapatite OR 'biologically inert'):ab,ti)</p> <p>NOT ((animal'/exp OR 'nonhuman'/exp) NOT 'human'/exp)</p> <p>NOT ('review'/exp OR 'case report'/exp OR 'conference abstract'/it)</p> | 2656 |
| Cochrane Central Register of Controlled Trials<br>( <a href="http://www.thecochranelibrary.com">www.thecochranelibrary.com</a> ) | <p>(maxill* OR mandib* OR jaw OR orthognat* OR craniofac* OR craniomaxil* OR retrognat* OR orthodont* OR osteotom* OR zygom* OR "split ramus" OR (malocclus* AND surg*) OR ((orbit* OR facial OR face OR nose OR nasal) AND (fract* OR injur* OR reconstruct* OR surg*)))</p> <p>AND (plate* OR screw* OR miniscrew* OR miniplate* OR implant* OR osteosynth* OR osseointegrat* OR osteofixat* OR osteotom* OR fixat*)</p> <p>AND (bioresorb* OR biodegrad* OR bioabsorb* OR bioadsorb* OR absorb* OR resorb* OR adsorb* OR "Lactic acid" OR "Polyglycolic acid" OR Hydroxyapatite* OR "biologically inert")</p>                                                                                                                                                                                                                                                                                                                                                                                                                                                                                                                                                                                                                                                                                                                                                                                                                                                                                                                                                      | 663  |
| Web of Science<br>( <a href="http://www.webofknowledge.com">www.webofknowledge.com</a> )                                         | <p>TS=(maxill* OR mandib* OR jaw OR orthognat* OR craniofac* OR craniomaxil* OR retrognat* OR orthodont* OR osteotom* OR zygom* OR "split ramus" OR (malocclus* AND surg*) OR ((orbit* OR facial OR face OR nose OR nasal) AND (fract* OR injur* OR reconstruct* OR surg*)))</p> <p>AND</p> <p>TS=(plate* OR screw* OR miniscrew* OR miniplate* OR implant* OR osteosynth* OR osseointegrat* OR osteofixat* OR osteotom* OR fixat*)</p> <p>AND</p> <p>TS=(bioresorb* OR biodegrad* OR bioabsorb* OR bioadsorb* OR absorb* OR resorb* OR adsorb* OR "Lactic acid" OR "Polyglycolic acid" OR Hydroxyapatite* OR "biologically inert")</p> <p>NOT</p> <p>DT=(review OR "meeting abstract")</p>                                                                                                                                                                                                                                                                                                                                                                                                                                                                                                                                                                                                                                                                                                                                                                                                                                                                           | 7820 |
| EBSCOhost<br>( <a href="http://search.ebscohost.com">search.ebscohost.com</a> )<br>Databases:                                    | <p>((maxill* OR mandib* OR jaw OR orthognat* OR craniofac* OR craniomaxil* OR retrognat* OR orthodont* OR osteotom* OR zygom* OR "split ramus" OR (malocclus* AND surg*) OR ((orbit* OR facial OR face OR nose OR nasal) AND (fract* OR injur* OR reconstruct* OR surg*)))</p> <p>AND</p>                                                                                                                                                                                                                                                                                                                                                                                                                                                                                                                                                                                                                                                                                                                                                                                                                                                                                                                                                                                                                                                                                                                                                                                                                                                                             | 2608 |

|                                                                                                |                                                                                                                                                                                                                                                                                                                                                                                                                                                                                                                                                                                                                                                 |      |
|------------------------------------------------------------------------------------------------|-------------------------------------------------------------------------------------------------------------------------------------------------------------------------------------------------------------------------------------------------------------------------------------------------------------------------------------------------------------------------------------------------------------------------------------------------------------------------------------------------------------------------------------------------------------------------------------------------------------------------------------------------|------|
| Academic search Premier, Business Source Premier, Military & Government Collection, and CINAHL | (plate* OR screw* OR miniscrew* OR miniplate* OR implant* OR osteosynth* OR osseointegrat* OR osteofixat* OR osteotom* OR fixat*)<br>AND<br>(bioresorb* OR biodegrad* OR bioabsorb* OR bioadsorb* OR absorb* OR resorb* OR adsorb* OR "Lactic acid" OR "Polyglycolic acid" OR Hydroxyapatite* OR "biologically inert"))                                                                                                                                                                                                                                                                                                                         |      |
| Scopus (www.scopus.com/)                                                                       | TITLE-ABS-KEY(maxill* OR mandib* OR jaw OR orthognat* OR craniofac* OR craniomaxil* OR retrognat* OR orthodont* OR osteotom* OR zygom* OR "split ramus" OR (malocclus* AND surg*) OR ((orbit* OR facial OR face OR nose OR nasal) AND (fract* OR injur* OR reconstruct* OR surg*)))<br>AND<br>TITLE-ABS-KEY(plate* OR screw* OR miniscrew* OR miniplate* OR implant* OR osteosynth* OR osseointegrat* OR osteofixat* OR osteotom* OR fixat*)<br>AND<br>TITLE-ABS-KEY(bioresorb* OR biodegrad* OR bioabsorb* OR bioadsorb* OR absorb* OR resorb* OR adsorb* OR "Lactic acid" OR "Polyglycolic acid" OR Hydroxyapatite* OR "biologically inert")) | 7981 |
| African Journals Online (www.ajol.info/)                                                       | (maxillary OR mandibular OR orthognathic OR craniofacial OR craniomaxillofacial) AND (bioresorbable OR biodegradable)                                                                                                                                                                                                                                                                                                                                                                                                                                                                                                                           | 41   |
| OpenGrey (www.opengrey.eu)                                                                     | ((maxill* OR mandib* OR jaw OR orthognat* OR craniofac* OR craniomaxil* OR retrognat* OR orthodont* OR osteotom* OR zygom* OR "split ramus" OR (malocclus* AND surg*) OR ((orbit* OR facial OR face OR nose OR nasal) AND (fract* OR injur* OR reconstruct* OR surg*)))<br>AND<br>(bioresorb* OR biodegrad* OR bioabsorb* OR bioadsorb* OR absorb* OR resorb* OR adsorb* OR "Lactic acid" OR "Polyglycolic acid" OR Hydroxyapatite* OR "biologically inert"))                                                                                                                                                                                   | 40   |
| ClinicalTrials.gov                                                                             | Condition: (maxillary OR mandibular OR orthognathic OR craniofacial OR craniomaxillofacial)<br>Other terms: (bioresorbable OR biodegradable)                                                                                                                                                                                                                                                                                                                                                                                                                                                                                                    | 5    |

**Table S2:** Endpoints divided into five time units.

| <b>Time unit</b>                                                   | <b>Endpoints</b>                                                                                                                  |
|--------------------------------------------------------------------|-----------------------------------------------------------------------------------------------------------------------------------|
| <b>Perioperative</b>                                               | Plate and/or screw breakage, operation time, and handling by surgeon                                                              |
| <b>Short-term (0-4 weeks; soft tissue healing)</b>                 | Infection, dehiscence, malocclusion, pain, swelling, plate exposure, MMO, abscess, and analgesics used                            |
| <b>Intermediate follow-up<br/>(6 – 12 weeks; bone healing)</b>     | Malunion, mobility of bone segments, malocclusion, MMO, TMJ-dysfunction, and pain                                                 |
| <b>Long-term follow-up<br/>(&gt;12 weeks; degradation effects)</b> | Palpability of plate and screws, malocclusion, pain, swelling, satisfaction, TMJ-dysfunction, MMO, abscess, and MFIQ              |
| <b>Overall</b>                                                     | Skeletal stability (i.e., skeletal relapse), symptomatic device removal, additional surgery (not device removal), and total costs |

*MMO: maximal mouth opening; TMJ-dysfunction: temporomandibular joint dysfunction; MFIQ: Mandibular Function Impairment Questionnaire.*

**Table S3:** List with contacted authors of original articles.

| Study                      | Dates of contact                                            | Reasons for contact                                                                                                                                                                                                                                                                  | Responses                                                                                                                                                                                                                                                                                                                                                                                                                                                                                                                                                                               |
|----------------------------|-------------------------------------------------------------|--------------------------------------------------------------------------------------------------------------------------------------------------------------------------------------------------------------------------------------------------------------------------------------|-----------------------------------------------------------------------------------------------------------------------------------------------------------------------------------------------------------------------------------------------------------------------------------------------------------------------------------------------------------------------------------------------------------------------------------------------------------------------------------------------------------------------------------------------------------------------------------------|
| Matthews et al. (2003)[1]  | 19 May 2018, 29 May 2018, and 22 August 2018.               | <ol style="list-style-type: none"> <li>1. Details regarding study design</li> <li>2. Details regarding the distribution of data of the outcomes 'operative displacement' and 'relapse'</li> <li>3. Details regarding the allocation of two patients with TMJ-dysfunction.</li> </ol> | <ol style="list-style-type: none"> <li>1. "It was a randomised study using odd/even registration numbers that are linked to concealed envelopes."</li> <li>2. "Unfortunately, I don't have access to the original data, it has been more than 15 years since we conducted this study."</li> <li>3. "Apology, I can't remember."</li> </ol>                                                                                                                                                                                                                                              |
| Cheung et al. (2008)[2]    | 29 May 2018, 1 August 2018, 22 August 2018, 19 October 2018 | <ol style="list-style-type: none"> <li>1. All reported data are presented in figures only. No numbers are available to include in the meta-analyses.</li> </ol>                                                                                                                      | No response                                                                                                                                                                                                                                                                                                                                                                                                                                                                                                                                                                             |
| Stockmann et al. (2010)[3] | 29 May 2018, 1 August 2018, 10 August 2018                  | <ol style="list-style-type: none"> <li>1. Data not reported per treatment group</li> <li>2. Definition of relapse (i.e., it currently is a binary variable).</li> </ol>                                                                                                              | No response                                                                                                                                                                                                                                                                                                                                                                                                                                                                                                                                                                             |
| Tuovinen et al. (2010)[4]  | 23 August 2018, 24 August 2018, and 19 October 2018         | <ol style="list-style-type: none"> <li>1. Only P-values of difference between relapse of both treatment groups are reported, not the amount of relapse itself.</li> </ol>                                                                                                            | <ol style="list-style-type: none"> <li>1. "Thank you for your interest concerning my report. I have not found my raw data yet. I'll keep on digging in my old cd-copies. My computer has been changed several times and we have been moving to three different location since that report and in the archive where the data should be I could not find it. I'll continue to look for the data."</li> <li>2. "I have not found SPSS files but all handmade (written) measurements can be find, but it would be quite a job to copy and explain my notes and put them again in</li> </ol> |



|                         |                                                  |                                                                                                                    |                                                                                               |
|-------------------------|--------------------------------------------------|--------------------------------------------------------------------------------------------------------------------|-----------------------------------------------------------------------------------------------|
|                         |                                                  |                                                                                                                    | SPSS. Attached one example of measurements."<br>3. No response after asking for all the data. |
| Landes et al. (2006)[5] | 29 May 2018, 22 August 2018, 19 October 2018     | 1. Details regarding the absolute number of screw and plate breakage per treatment group.                          | No response                                                                                   |
| Paeng et al. (2012)[6]  | 29 May 2018, 22 August 2018, and 19 October 2018 | 1. Details regarding the single patient that demonstrated infection after 7 days follow-up: which treatment group? | No response                                                                                   |

**Table S4:** Excluded articles with reasons for exclusion after full-text screening.

| <b>Author (year)</b>           | <b>Reason for exclusion</b>                                      | <b>Reference</b> |
|--------------------------------|------------------------------------------------------------------|------------------|
| Ahmed et al. (2013)            | Surgical procedure not relevant for this review                  | [7]              |
| Arshad et al. (2019)           | Surgical procedure not relevant for this review                  | [8]              |
| Arya et al. (2020)             | Surgical procedure not relevant for this review                  | [9]              |
| Bekal et al. (2017)            | Surgical procedure not relevant for this review                  | [10]             |
| Bell et al. (2006)             | Surgical procedure not relevant for this review                  | [11]             |
| Bhatt et al. (2010)            | Surgical procedure not relevant for this review                  | [12]             |
| Bhatt et al. (2015)            | Surgical procedure not relevant for this review                  | [13]             |
| Bohm et al. (1998)             | Surgical procedure not relevant for this review                  | [14]             |
| Bouletreau et al. (2005)       | Both groups consist of biodegradable and titanium osteosynthesis | [15]             |
| Burlini et al. (2015)          | Surgical procedure not relevant for this review                  | [16]             |
| Champy et al. (1992)           | No control group                                                 | [17]             |
| Wang et al. (2013)             | Surgical procedure not relevant for this review                  | [18]             |
| Fakourand et al. (2012)        | Surgical procedure not relevant for this review                  | [19]             |
| Filinte et al. (2015)          | Surgical procedure not relevant for this review                  | [20]             |
| Fuente del Campo et al. (1996) | No control group; Biodegradable plates with titanium screws used | [21]             |
| Hashiba et al. (2007)          | No relevant endpoints for this review                            | [22]             |
| Ho et al. (2011)               | No pure biodegradable group, only titanium or mixed groups       | [23]             |
| Hwang et al. (2017)            | No pure biodegradable group, only titanium or mixed groups       | [24]             |
| Iatrou et al. (2010)           | Surgical procedure not relevant for this review                  | [25]             |
| Illi et al. (1989)             | Children with syndromic disorders included                       | [26]             |
| Imola et al. (2002)            | Review paper                                                     | [27]             |
| Janickova et al. (2018)        | Surgical procedure not relevant for this review                  | [28]             |
| Kallela et al. (1999)          | Review paper                                                     | [29]             |
| Kang et al. (2014)             | Surgical procedure not relevant for this review                  | [30]             |
| Kim et al. (2018)              | Surgical procedure not relevant for this review                  | [31]             |
| Kobayashi et al. (2004)        | No control group                                                 | [32]             |
| Kretschmer et al. (2011)       | Surgical procedure not relevant for this review                  | [33]             |
| Landes et al. (2014)           | Patients with cleft lip and palate included                      | [34]             |
| Landes et al. (2015)           | No control group                                                 | [35]             |
| Lee et al. (2010)              | Surgical procedure not relevant for this review                  | [36]             |
| Lee et al. (2014)              | Surgical procedure not relevant for this review                  | [37]             |
| Lee et al. (2014)              | Endpoint not relevant for this review                            | [38]             |
| Leno et al. (2017)             | Surgical procedure not relevant for this review                  | [39]             |

|                         |                                                                  |      |
|-------------------------|------------------------------------------------------------------|------|
| Leonhardt et al. (2008) | Surgical procedure not relevant for this review                  | [40] |
| Lim et al. (2014)       | Surgical procedure not relevant for this review                  | [41] |
| Liu et al. (2016)       | Surgical procedure not relevant for this review                  | [42] |
| Mahmoud et al. (2016)   | Surgical procedure not relevant for this review                  | [43] |
| Menon et al. (2007)     | Surgical procedure not relevant for this review                  | [44] |
| Menon et al. (2012)     | Surgical procedure not relevant for this review                  | [45] |
| Netto et al. (2013)     | Surgical procedure not relevant for this review                  | [46] |
| Obwegeser et al. (1994) | No biodegradable osteosynthesis used, only biodegradable sutures | [47] |
| Park et al. (2005)      | Surgical procedure not relevant for this review                  | [48] |
| Park et al. (2011)      | Surgical procedure not relevant for this review                  | [49] |
| Pistner et al. (1991)   | Review paper                                                     | [50] |
| Qiu et al. (2015)       | Surgical procedure not relevant for this review                  | [51] |
| Stuck et al. (2011)     | Review paper                                                     | [52] |
| Sukegawa et al. (2016)  | Surgical procedure not relevant for this review                  | [53] |
| Tan et al. (2011)       | Surgical procedure not relevant for this review                  | [54] |
| Tripathi et al. (2013)  | Surgical procedure not relevant for this review                  | [55] |
| Ueki et al. (2011b)     | Does not fulfill inclusion criteria                              | [56] |
| Ueki et al. (2015b)     | Does not fulfill inclusion criteria                              | [57] |
| Ueki et al. (2017)      | Does not fulfill inclusion criteria                              | [58] |
| Wittwer et al. (2006)   | Surgical procedure not relevant for this review                  | [59] |
| Wu et al. (2017)        | Surgical procedure not relevant for this review                  | [60] |
| Zheng et al. (2001)     | No control group                                                 | [61] |



| Study name (year)                | Osteosynthesis system | Perioperative endpoints |                    | Short-term follow-up                              |                                               |               |              | Intermediate follow-up |          |                |                   | Long-term follow-up |                  |                       |                  | Overall follow-up |               |                     |                  |          |               |                     |                    |             |              |                             |                  |                                     |                                                   |                                          |                                   |   |
|----------------------------------|-----------------------|-------------------------|--------------------|---------------------------------------------------|-----------------------------------------------|---------------|--------------|------------------------|----------|----------------|-------------------|---------------------|------------------|-----------------------|------------------|-------------------|---------------|---------------------|------------------|----------|---------------|---------------------|--------------------|-------------|--------------|-----------------------------|------------------|-------------------------------------|---------------------------------------------------|------------------------------------------|-----------------------------------|---|
|                                  |                       | Plate breakage (%)      | Screw breakage (%) | Operation time (mean±SD, in minutes) <sup>a</sup> | Handling by surgeon (0: worst; 10: excellent) | Infection (%) | Swelling (%) | Abscess (%)            | Pain (%) | MMO (%)        | Dehiscence (%)    | Plate exposure (%)  | Malunion (%)     | Mobility segments (%) | Malocclusion (%) | Pain (%)          | MMO (mean±SD) | TMJ-dysfunction (%) | Malocclusion (%) | Pain (%) | MMO (mean±SD) | TMJ-dysfunction (%) | MFIQ (median, IQR) | Abscess (%) | Swelling (%) | Palpability screw/plate (%) | Satisfaction (%) | Symptomatic plate/screw removal (%) | Costs (direct and indirect; mean±SD) <sup>a</sup> | Revision surgery (not device removal; %) | Skeletal stability assessed (yes) |   |
| Park (2010)[65]                  | B                     |                         |                    |                                                   |                                               |               |              |                        |          |                |                   |                     |                  |                       |                  |                   |               |                     |                  |          |               |                     |                    |             |              |                             |                  |                                     |                                                   |                                          |                                   | x |
|                                  | T                     |                         |                    |                                                   |                                               |               |              |                        |          |                |                   |                     |                  |                       |                  |                   |               |                     |                  |          |               |                     |                    |             |              |                             |                  |                                     |                                                   |                                          |                                   | x |
| Stockmann (2010)[3]              | B                     | 9.1                     | +36 <sup>d</sup>   |                                                   | 3                                             |               |              | NNA                    | 3        | NNA            |                   |                     |                  |                       |                  | NNA               | 5.9 (O)       |                     |                  |          |               |                     |                    |             |              |                             | 62               | 0                                   |                                                   |                                          |                                   |   |
|                                  | T                     | 3                       | NNA <sup>d</sup>   |                                                   | 3                                             |               |              | NNA                    | 0        | 0 <sup>e</sup> |                   |                     |                  |                       |                  | NNA               | 5.9 (O)       |                     |                  |          |               |                     |                    |             |              |                             |                  |                                     | 3                                                 |                                          |                                   |   |
| Tuovinen (2010)[4]               | B                     |                         |                    |                                                   | 0                                             |               |              |                        |          |                |                   |                     |                  |                       |                  |                   |               |                     |                  |          |               |                     |                    |             |              |                             |                  |                                     | 2                                                 | 2                                        | x                                 |   |
|                                  | T                     |                         |                    |                                                   | 0                                             |               |              |                        |          |                |                   |                     |                  |                       |                  |                   |               |                     |                  |          |               |                     |                    |             |              |                             |                  |                                     | 4                                                 | 4                                        | x                                 |   |
| Buijs (2012)[66]                 | B                     | 0                       | 0                  | 137± 7.6±                                         | 0.7 <sup>a</sup>                              | 17.1          | 11.8         |                        | 3.9      | 2.6            | 9.2               | 5.15±               | 8.9 <sup>a</sup> |                       |                  |                   |               |                     |                  |          |               |                     |                    |             |              |                             |                  |                                     | 1.3                                               | 0                                        |                                   |   |
|                                  | T                     | 0                       | 0                  | 116± 8.5±                                         | 1.2 <sup>a</sup>                              | 7.3           | 4.8          |                        | 1.6      | 0              | 10.6 <sup>a</sup> |                     |                  |                       |                  |                   |               |                     |                  |          |               |                     |                    |             |              |                             |                  |                                     | 1.6                                               | 0.8                                      |                                   |   |
| Yoshioka (2012)[67]              | B                     | 2.7                     |                    |                                                   | 0                                             |               |              |                        |          |                |                   |                     |                  |                       |                  |                   |               |                     |                  |          |               |                     |                    |             |              | 1.8                         | 5.5              | 0                                   |                                                   |                                          |                                   |   |
|                                  | T                     | 0                       |                    |                                                   | 1.1                                           |               |              |                        |          |                |                   |                     |                  |                       |                  |                   |               |                     |                  |          |               |                     |                    |             |              | 0                           | 3.3              | 0                                   |                                                   |                                          |                                   |   |
| Bakelen (2013)[68], <sup>e</sup> |                       |                         |                    |                                                   |                                               |               |              |                        |          |                |                   |                     |                  |                       |                  |                   |               |                     |                  |          |               |                     |                    |             |              |                             |                  |                                     |                                                   |                                          |                                   |   |
|                                  | B                     |                         |                    |                                                   |                                               |               |              |                        |          |                |                   |                     |                  |                       |                  |                   |               |                     |                  |          |               |                     |                    |             |              |                             |                  |                                     |                                                   |                                          |                                   |   |



| Study name (year)                   | Osteosynthesis system | Endpoints               |                    |                                                   |                                               |               |              |             |                        |         |                |                    |                     |                       |                  |                   |               |                     |                  |          |               |                     |                    |             |              |                             |                  |                                     |                                                   |                                          |                                   |   |
|-------------------------------------|-----------------------|-------------------------|--------------------|---------------------------------------------------|-----------------------------------------------|---------------|--------------|-------------|------------------------|---------|----------------|--------------------|---------------------|-----------------------|------------------|-------------------|---------------|---------------------|------------------|----------|---------------|---------------------|--------------------|-------------|--------------|-----------------------------|------------------|-------------------------------------|---------------------------------------------------|------------------------------------------|-----------------------------------|---|
|                                     |                       | Perioperative endpoints |                    |                                                   | Short-term follow-up                          |               |              |             | Intermediate follow-up |         |                |                    | Long-term follow-up |                       |                  | Overall follow-up |               |                     |                  |          |               |                     |                    |             |              |                             |                  |                                     |                                                   |                                          |                                   |   |
|                                     |                       | Plate breakage (%)      | Screw breakage (%) | Operation time (mean±SD, in minutes) <sup>a</sup> | Handling by surgeon (0: worst; 10: excellent) | Infection (%) | Swelling (%) | Abscess (%) | Pain (%)               | MMO (%) | Dehiscence (%) | Plate exposure (%) | Malunion (%)        | Mobility segments (%) | Malocclusion (%) | Pain (%)          | MMO (mean±SD) | TMJ-dysfunction (%) | Malocclusion (%) | Pain (%) | MMO (mean±SD) | TMJ-dysfunction (%) | MFIQ (median, IQR) | Abscess (%) | Swelling (%) | Palpability screw/plate (%) | Satisfaction (%) | Symptomatic plate/screw removal (%) | Costs (direct and indirect; mean±SD) <sup>a</sup> | Revision surgery (not device removal; %) | Skeletal stability assessed (yes) |   |
| <i>Prospective cohort studies</i>   |                       |                         |                    |                                                   |                                               |               |              |             |                        |         |                |                    |                     |                       |                  |                   |               |                     |                  |          |               |                     |                    |             |              |                             |                  |                                     |                                                   |                                          |                                   |   |
| Ferretti<br>(2002)[72]              | B                     |                         |                    |                                                   |                                               | 0             |              |             |                        |         |                |                    |                     |                       |                  |                   |               |                     |                  |          |               |                     |                    |             |              |                             |                  |                                     |                                                   |                                          |                                   | x |
|                                     | T                     |                         |                    |                                                   |                                               | 0             |              |             |                        |         |                |                    |                     |                       |                  |                   |               |                     |                  |          |               |                     |                    |             |              |                             |                  |                                     |                                                   |                                          |                                   | x |
| Dhol<br>(2008)[73]                  | B                     |                         |                    |                                                   |                                               | 0             | 0            |             | 0                      |         |                |                    |                     |                       |                  | 0                 |               |                     | 0                |          |               |                     |                    |             |              | 0                           |                  |                                     |                                                   |                                          | x                                 |   |
|                                     | T                     |                         |                    |                                                   |                                               | 0             | 0            |             | 0                      |         |                |                    |                     |                       |                  | 0                 |               |                     | 0                |          |               |                     |                    |             |              | 0                           |                  |                                     |                                                   |                                          | x                                 |   |
| Bakelen<br>(2014)[74]               | B                     |                         |                    |                                                   |                                               |               |              |             |                        |         |                |                    |                     |                       |                  |                   |               |                     |                  |          |               |                     |                    |             |              |                             |                  |                                     |                                                   |                                          | x                                 |   |
|                                     | T                     |                         |                    |                                                   |                                               |               |              |             |                        |         |                |                    |                     |                       |                  |                   |               |                     |                  |          |               |                     |                    |             |              |                             |                  |                                     |                                                   |                                          | x                                 |   |
| <i>Retrospective cohort studies</i> |                       |                         |                    |                                                   |                                               |               |              |             |                        |         |                |                    |                     |                       |                  |                   |               |                     |                  |          |               |                     |                    |             |              |                             |                  |                                     |                                                   |                                          |                                   |   |
| Harada<br>(1997)[75]                | B                     |                         |                    |                                                   |                                               |               |              |             |                        |         |                |                    |                     |                       |                  |                   |               | 0                   |                  |          |               | 0                   |                    |             |              |                             |                  |                                     |                                                   |                                          | x                                 |   |
|                                     | T                     |                         |                    |                                                   |                                               |               |              |             |                        |         |                |                    |                     |                       |                  |                   |               | 0                   |                  |          |               | 0                   |                    |             |              |                             |                  |                                     |                                                   |                                          |                                   | x |
| Costa<br>(2006)[76]                 | B                     |                         |                    |                                                   |                                               | 0             |              |             |                        | 0       | 0 <sup>c</sup> | 0                  | 0                   |                       |                  |                   |               | 20                  |                  |          |               |                     |                    |             | 20           |                             |                  |                                     | 20                                                | x                                        |                                   |   |
|                                     | T                     |                         |                    |                                                   |                                               | 0             |              |             |                        | 0       | 0 <sup>c</sup> | 0                  | 0                   |                       |                  |                   |               | 0                   |                  |          |               |                     |                    |             | 0            |                             |                  |                                     | 0                                                 | x                                        |                                   |   |
| Landes<br>(2006)[5]                 | B                     |                         | 5 <sup>#</sup>     |                                                   |                                               |               |              |             |                        |         |                |                    |                     |                       | 0                |                   |               |                     |                  |          |               |                     |                    |             |              |                             |                  |                                     |                                                   |                                          | x                                 |   |
|                                     | T                     |                         | 0 <sup>#</sup>     |                                                   |                                               |               |              |             |                        |         |                |                    |                     |                       | 0                |                   |               |                     |                  |          |               |                     |                    |             |              |                             |                  |                                     |                                                   |                                          | x                                 |   |
| Turvey<br>(2006)[77]                | B                     |                         |                    |                                                   |                                               |               |              |             |                        |         |                |                    |                     |                       |                  |                   |               |                     |                  |          |               |                     |                    |             |              |                             |                  |                                     |                                                   |                                          | x                                 |   |
|                                     | T                     |                         |                    |                                                   |                                               |               |              |             |                        |         |                |                    |                     |                       |                  |                   |               |                     |                  |          |               |                     |                    |             |              |                             |                  |                                     |                                                   |                                          | x                                 |   |

| Study name (Year)      | Osteosynthesis system | Perioperative endpoints |                    |                                                   |                                               |               |              |             |          |          |                       | Short-term follow-up |              |                       |                  |          | Intermediate follow-up |                     |                  |          |               | Long-term follow-up |                    |             |              |                             | Overall follow-up |                                     |                                                   |                                          |                                   |   |
|------------------------|-----------------------|-------------------------|--------------------|---------------------------------------------------|-----------------------------------------------|---------------|--------------|-------------|----------|----------|-----------------------|----------------------|--------------|-----------------------|------------------|----------|------------------------|---------------------|------------------|----------|---------------|---------------------|--------------------|-------------|--------------|-----------------------------|-------------------|-------------------------------------|---------------------------------------------------|------------------------------------------|-----------------------------------|---|
|                        |                       | Plate breakage (%)      | Screw breakage (%) | Operation time (mean±SD, in minutes) <sup>a</sup> | Handling by surgeon (0: worst; 10: excellent) | Infection (%) | Swelling (%) | Abscess (%) | Pain (%) | MMO (%)  | Dehiscence (%)        | Plate exposure (%)   | Malunion (%) | Mobility segments (%) | Malocclusion (%) | Pain (%) | MMO (mean±SD)          | TMJ-dysfunction (%) | Malocclusion (%) | Pain (%) | MMO (mean±SD) | TMJ-dysfunction (%) | MFIQ (median, IQR) | Abscess (%) | Swelling (%) | Palpability screw/plate (%) | Satisfaction (%)  | Symptomatic plate/screw removal (%) | Costs (direct and indirect; mean±SD) <sup>a</sup> | Revision surgery (not device removal; %) | Skeletal stability assessed (Yes) |   |
| Ueki (2006a and b)[78] | B                     |                         |                    |                                                   |                                               | a & b: 0      |              |             |          | a & b: 0 | a & b: 0 <sup>c</sup> |                      |              |                       |                  |          |                        |                     |                  |          |               |                     |                    |             |              |                             |                   |                                     |                                                   |                                          |                                   | x |
|                        | T                     |                         |                    |                                                   |                                               | a & b: 0      |              |             |          | a & b: 0 | a & b: 0 <sup>c</sup> |                      |              |                       |                  |          |                        |                     |                  |          |               |                     |                    |             |              |                             |                   |                                     |                                                   |                                          |                                   | x |
| Landes (2007)[79]      | B                     | 12 <sup>#</sup>         |                    |                                                   |                                               |               |              |             |          |          |                       |                      | 0            |                       |                  |          |                        |                     |                  |          |               |                     |                    |             |              |                             |                   |                                     |                                                   |                                          |                                   | x |
|                        | T                     | 0 <sup>#</sup>          |                    |                                                   |                                               |               |              |             |          |          |                       |                      | 0            |                       |                  |          |                        |                     |                  |          |               |                     |                    |             |              |                             |                   |                                     |                                                   |                                          |                                   | x |
| Ueki (2009)[80]        | B                     |                         |                    |                                                   |                                               | 0             |              |             |          | 0        | 0 <sup>c</sup>        | 0                    | 0            |                       |                  |          |                        |                     | 0                |          |               |                     |                    |             |              |                             |                   |                                     |                                                   |                                          |                                   |   |
|                        | T                     |                         |                    |                                                   |                                               | 0             |              |             |          | 0        | 0 <sup>c</sup>        | 0                    | 0            |                       |                  |          |                        |                     | 0                |          |               |                     |                    |             |              |                             |                   |                                     |                                                   |                                          |                                   |   |
| Ahn (2010)[81]         | B                     |                         |                    |                                                   |                                               | 4.2           |              |             |          |          |                       |                      |              |                       |                  |          |                        |                     |                  |          |               |                     |                    | 5.8         |              |                             |                   |                                     |                                                   | 2.5                                      |                                   |   |
|                        | T                     |                         |                    |                                                   |                                               | 0             |              |             |          |          |                       |                      |              |                       |                  |          |                        |                     |                  |          |               |                     |                    | 6.6         |              |                             |                   |                                     |                                                   | 0                                        |                                   |   |
| Choi (2010)[82]        | B                     |                         |                    |                                                   |                                               |               |              |             |          |          |                       |                      |              |                       |                  |          |                        |                     |                  |          |               |                     |                    |             |              |                             |                   |                                     |                                                   |                                          |                                   | x |
|                        | T                     |                         |                    |                                                   |                                               |               |              |             |          |          |                       |                      |              |                       |                  |          |                        |                     |                  |          |               |                     |                    |             |              |                             |                   |                                     |                                                   |                                          |                                   | x |
| Ueki (2011)[83]        | B                     |                         |                    |                                                   |                                               | 0             |              |             |          |          |                       |                      |              |                       |                  |          |                        |                     | 0                |          |               |                     |                    |             |              |                             |                   |                                     |                                                   |                                          |                                   | x |
|                        | T                     |                         |                    |                                                   |                                               | 0             |              |             |          |          |                       |                      |              |                       |                  |          |                        |                     | 0                |          |               |                     |                    |             |              |                             |                   |                                     |                                                   |                                          |                                   | x |
| Ballon (2012)[84]      | B                     |                         |                    |                                                   |                                               |               |              |             |          |          |                       |                      |              |                       |                  |          |                        |                     |                  |          |               |                     |                    |             |              |                             |                   |                                     |                                                   |                                          |                                   | x |
|                        | T                     |                         |                    |                                                   |                                               |               |              |             |          |          |                       |                      |              |                       |                  |          |                        |                     |                  |          |               |                     |                    |             |              |                             |                   |                                     |                                                   |                                          |                                   | x |



| Study name (year) | Osteosynthesis system | Outcome measures        |                    |                                                   |                                               |               |              |             |                        |         |                |                    |                     |                       |                  |                   |               |                     |                  |          |               |                     |                    |             |              |                             |                  |                                     |                                                   |                                          |                                   |   |
|-------------------|-----------------------|-------------------------|--------------------|---------------------------------------------------|-----------------------------------------------|---------------|--------------|-------------|------------------------|---------|----------------|--------------------|---------------------|-----------------------|------------------|-------------------|---------------|---------------------|------------------|----------|---------------|---------------------|--------------------|-------------|--------------|-----------------------------|------------------|-------------------------------------|---------------------------------------------------|------------------------------------------|-----------------------------------|---|
|                   |                       | Perioperative endpoints |                    |                                                   | Short-term follow-up                          |               |              |             | Intermediate follow-up |         |                |                    | Long-term follow-up |                       |                  | Overall follow-up |               |                     |                  |          |               |                     |                    |             |              |                             |                  |                                     |                                                   |                                          |                                   |   |
|                   |                       | Plate breakage (%)      | Screw breakage (%) | Operation time (mean±SD, in minutes) <sup>a</sup> | Handling by surgeon (0: worst; 10: excellent) | Infection (%) | Swelling (%) | Abscess (%) | Pain (%)               | MMO (%) | Dehiscence (%) | Plate exposure (%) | Malunion (%)        | Mobility segments (%) | Malocclusion (%) | Pain (%)          | MMO (mean±SD) | TMJ-dysfunction (%) | Malocclusion (%) | Pain (%) | MMO (mean±SD) | TMJ-dysfunction (%) | MFIQ (median, IQR) | Abscess (%) | Swelling (%) | Palpability screw/plate (%) | Satisfaction (%) | Symptomatic plate/screw removal (%) | Costs (direct and indirect; mean±SD) <sup>a</sup> | Revision surgery (not device removal; %) | Skeletal stability assessed (yes) |   |
| Paeng (2012)[6]   | B                     | 1.6 <sup>#</sup>        |                    |                                                   | NNA                                           |               |              |             |                        |         |                |                    |                     |                       |                  |                   |               |                     |                  |          |               |                     |                    |             |              |                             |                  |                                     |                                                   | NNA                                      | x                                 |   |
|                   | T                     | 0 <sup>#</sup>          |                    |                                                   | NNA                                           |               |              |             |                        |         |                |                    |                     |                       |                  |                   |               |                     |                  |          |               |                     |                    |             |              |                             |                  |                                     |                                                   | NNA                                      | x                                 |   |
| Ueki (2012)[85]   | B                     |                         |                    |                                                   |                                               | 0             |              |             |                        | 0       |                |                    |                     | 0                     |                  |                   |               | 0                   |                  |          |               |                     |                    |             |              |                             |                  |                                     |                                                   |                                          |                                   | x |
|                   | T                     |                         |                    |                                                   |                                               | 0             |              |             |                        | 0       |                |                    |                     | 0                     |                  |                   |               | 0                   |                  |          |               |                     |                    |             |              |                             |                  |                                     |                                                   |                                          |                                   | x |
| Blakey (2014)[86] | B                     |                         |                    |                                                   |                                               |               |              |             |                        |         |                |                    |                     |                       |                  |                   |               |                     |                  |          |               |                     |                    |             |              |                             |                  |                                     |                                                   | 0                                        | x                                 |   |
|                   | T                     |                         |                    |                                                   |                                               |               |              |             |                        |         |                |                    |                     |                       |                  |                   |               |                     |                  |          |               |                     |                    |             |              |                             |                  |                                     |                                                   | 0                                        | x                                 |   |
| Lee (2014)[87]    | B                     |                         |                    |                                                   |                                               | 0             |              |             |                        |         |                |                    |                     |                       |                  |                   |               |                     |                  |          |               |                     |                    |             |              |                             |                  |                                     |                                                   |                                          |                                   | x |
|                   | T                     |                         |                    |                                                   |                                               | 0             |              |             |                        |         |                |                    |                     |                       |                  |                   |               |                     |                  |          |               |                     |                    |             |              |                             |                  |                                     |                                                   |                                          |                                   | x |
| Ueki (2015)[88]   | B                     |                         |                    |                                                   |                                               | 0             |              |             |                        | 0       | 0 <sup>e</sup> | 0                  | 0                   |                       |                  |                   |               | 0                   |                  |          |               |                     |                    |             |              |                             |                  |                                     |                                                   |                                          |                                   |   |
|                   | T                     |                         |                    |                                                   |                                               | 0             |              |             |                        | 0       | 0 <sup>e</sup> | 0                  | 0                   |                       |                  |                   |               | 0                   |                  |          |               |                     |                    |             |              |                             |                  |                                     |                                                   |                                          |                                   |   |

All data are given in percentages, unless stated otherwise. All unit of analysis was number of patients, unless stated otherwise. <sup>a</sup>Unit of analysis was plates. <sup>#</sup>Unit of analysis was screws. <sup>†</sup>Data of the follow-up moment 6-12 months given. The follow-up moment 12-24 months had high proportion of participants lost to follow-up. <sup>a</sup>Data given in mean±standard deviation. <sup>b</sup>Percentage of surgeons 'satisfied' or higher with the osteosynthesis system. <sup>c</sup>If no wound dehiscence was present, plate exposure was also assessed as not present. <sup>d</sup>Only the difference in mean operative time of biodegradable compared to titanium osteosyntheses was reported. <sup>e</sup>Two follow-up moments: 1- and 2-year follow-up, respectively. <sup>f</sup>Postoperative minus preoperative MMO. B, biodegradable; T, titanium; O, objectively assessed; S, subjectively assessed; NNA, numbers not available. MMO, maximal mouth opening; TMJ-dysfunction, temporomandibular joint dysfunction; MFIQ, Mandibular Function Impairment Questionnaire; x, assessed (see Table S6). Empty cells: not reported. Note that (i) malocclusion and (ii)

*analgesic usage after short-term follow-up are not mentioned in this table as these endpoints were not assessed in any of the included studies, and (iii) that certain continuous variables are shown without standard deviations because these were not reported in the original manuscripts.*

**Table S6:** Operative displacement and relapse.

| Study (first author, year)          | Type of displacement        | Operative displacement (mean±SD or median (IQR), in mm or ° angle) |                      | Relapse (mean±SD or median (IQR), in mm or ° angle) |           | Follow-up | Lateral cephalometric reference marks |
|-------------------------------------|-----------------------------|--------------------------------------------------------------------|----------------------|-----------------------------------------------------|-----------|-----------|---------------------------------------|
|                                     |                             | B                                                                  | T                    | B                                                   | T         |           |                                       |
| <b>Randomised controlled trials</b> |                             |                                                                    |                      |                                                     |           |           |                                       |
| <b>Matthews et al. (2003)[1]</b>    | Mandibular horizontal       | 4.0 (0.0-5.0)                                                      | 4.0 (3.0-8.0)        | NNA                                                 |           | 1 yr      | Go                                    |
|                                     | Mandibular vertical         | 4.5 (2.0-6.0)                                                      | 4.5 (1.5-5.0)        |                                                     |           |           | Go                                    |
|                                     | Mandibular angle            | 4.2 (2.2-8.8)                                                      | 1.5 (1.0-8.0)        |                                                     |           |           | Ar-Go-Gn                              |
| <b>Norholt et al. (2004)[62]</b>    | Maxillary horizontal        | 2.3±2.8                                                            | 2.4±2.2              | 0.03±0.82                                           | 0.24±1.4  | 6 wks     | AI                                    |
|                                     | Maxillary vertical          | 2.1±1.6                                                            | 2.2±2.2              | 0.58±0.60                                           | 0.56±1.9  |           | AI                                    |
|                                     | Maxillary angle             | NR                                                                 | NR                   | 3.6±2.2                                             | 0.67±2.6  |           | OP                                    |
| <b>Ueki et al. (2005)[64]</b>       | Mandibular horizontal       | 2.0±3.6 <sup>a</sup>                                               | 3.5±5.3 <sup>a</sup> | 2.4±2.89                                            | 0.7±4.99  | 1 yr      | Pg                                    |
|                                     | Mandibular vertical         | 2.9±2.6 <sup>a</sup>                                               | 4.3±3.3 <sup>a</sup> | 0.1±2.61                                            | 2.5±2.94  |           | Pg                                    |
|                                     | Mandibular angle            | 8.8±2.0 <sup>a</sup>                                               | 3.4±2.4 <sup>a</sup> | 6.7±2.53                                            | 2.6±2.33  |           | Ar-Go-Gn                              |
| <b>Cheung et al. (2008)[2]</b>      | Maxillary horizontal (adv)  | 3.43±2.03                                                          | 4.0±2.45             | NNA                                                 |           | 1 yr      | Point-A                               |
|                                     | Maxillary horizontal (setb) | 1.12±1.12                                                          | 1.59±0.84            | NNA                                                 |           |           |                                       |
|                                     | Maxillary vertical (imp)    | 2.65±2.05                                                          | 3.27±1.84            | NNA                                                 |           |           |                                       |
|                                     | Maxillary vertical (elong)  | 2.87±1.94                                                          | 1.45±1.1             | NNA                                                 |           |           |                                       |
| <b>Park et al. (2010)[65]</b>       | Maxillary horizontal        | 1.88±1.19                                                          | 3.20±2.19            | 0.08±0.23                                           | 0.0±0.0   | 6 mos     | ANS                                   |
|                                     | Maxillary vertical          | 1.32±1.66                                                          | 2.25±1.98            | 0.07±0.41                                           | 0.0±0.24  |           | ANS                                   |
|                                     | Maxillary angle             | 2.45±1.12                                                          | 3.45±1.80            | 0.12±0.41                                           | 0.15±0.24 |           | SNA                                   |
|                                     | Mandibular horizontal       | 8.18±5.24                                                          | 8.70±8.43            | 0.60±1.96                                           | 1.45±2.95 |           | Pg                                    |
|                                     | Mandibular vertical         | 1.05±2.89                                                          | 2.00±2.16            | 1.26±1.52                                           | 1.85±1.73 |           | Pg                                    |
|                                     | Mandibular angle            | 0.55±4.20                                                          | 0.75±6.79            | 5.01±4.61                                           | 2.30±4.10 |           | Ar-Go-Gn                              |
| <b>Tuovinen et al. (2010)[4]</b>    | All                         | NNA                                                                | NNA                  | NNA                                                 | NNA       |           |                                       |
| <b>Prospective cohort studies</b>   |                             |                                                                    |                      |                                                     |           |           |                                       |

| Study (first author, year)                 | Type of displacement         | Operative displacement (mean±SD or median (IQR), in mm or ° angle) |                        | Relapse (mean±SD or median (IQR), in mm or ° angle) |                        | Follow-up | Lateral cephalometric reference marks |
|--------------------------------------------|------------------------------|--------------------------------------------------------------------|------------------------|-----------------------------------------------------|------------------------|-----------|---------------------------------------|
|                                            |                              | B                                                                  | T                      | B                                                   | T                      |           |                                       |
| <b>Ferretti et al. (2002)[72]</b>          | Mandibular horizontal        | 5.67±1.70 <sup>b</sup>                                             | 4.80±1.33 <sup>b</sup> | 0.83±1.25                                           | 0.25±1.38              | 6 mos     | Point-B                               |
|                                            | Maxillary horizontal         | 2.02±0.39 <sup>c</sup>                                             | 2.45±0.57 <sup>c</sup> | 0.20±0.43                                           | 0.80±0.43 <sup>c</sup> |           | Point-A                               |
| <b>Dhol et al. (2008)[73]</b>              | Maxillary vertical           | 2.46±0.71 <sup>c</sup>                                             | 2.14±0.65 <sup>c</sup> | 0.12±0.57                                           | 0.64±0.57 <sup>c</sup> | ≥8 mos    | Point-A                               |
|                                            | Maxillary angle              | 0.99±0.84 <sup>c</sup>                                             | 2.36±0.74 <sup>c</sup> | 0.04±0.69                                           | 0.00±0.69 <sup>c</sup> |           | Palatal plane                         |
| <b>Bakelen et al. (2014)[74]</b>           | Mandibular horizontal        | 3.2±1.6                                                            | 4.2±2.2                | 0.03±1.7                                            | 0.3±2.3                | 2 yrs     | Point-B                               |
|                                            | Mandibular vertical          | 4.8±1.8                                                            | 3.2±2.4                | 1.1±1.5                                             | 0.9±1.6                |           |                                       |
| <b>Retrospective cohort studies</b>        |                              |                                                                    |                        |                                                     |                        |           |                                       |
| <b>Harada et al. (1997)[75]</b>            | Mandibular horizontal        | NNA                                                                |                        | 1.62±1.28                                           | 1.05±1.00              | 1 yr      | Pg                                    |
|                                            | Mandibular vertical          |                                                                    |                        | 0.37±1.33                                           | 0.00±0.77              |           |                                       |
| <b>Costa et al. (2006)[76]</b>             | Maxillary horizontal         | 3.50±1.65                                                          | 3.54±1.54              | 0.90±1.37                                           | 0.16±0.72              | 1 yr      | Point-A                               |
|                                            | Maxillary vertical           | 0.95±1.79                                                          | 2.33±1.83              | 1.55±1.36                                           | 0.042±1.31             |           | Point-A                               |
|                                            | Maxillary angle              | 3.00±1.28                                                          | 3.32±1.62              | 0.57±1.20                                           | 0.02±0.64              |           | SNA                                   |
| <b>Landes et al. (2006)[5]<sup>d</sup></b> | Maxillary horizontal (adv)   | 3.5±4.1                                                            | 5.4±3.5                | 2.3±1.8                                             | 2.4±2.0                |           | Point-A                               |
|                                            | Maxillary horizontal (setb)  | 2.8±3.7                                                            | 1.9±1.8                | 2.3±1.9                                             | 2.5±1.7                |           | Point-A                               |
|                                            | Maxillary vertical (imp)     | 1.9±1.7                                                            | 3.3±2.7                | 2.1±1.9                                             | 2.2±1.5                |           | ANS                                   |
|                                            | Maxillary vertical (elong)   | 4.2±3.6                                                            | 3.7±5.2                | 3.8±3.1                                             | 3.1±3.6                | 1 yr      | ANS                                   |
|                                            | Mandibular horizontal (adv)  | 4.6±3.6                                                            | 6.3±8.8                | 4.9±4.3                                             | 5.1±8.2                |           | Point-B                               |
|                                            | Mandibular horizontal (setb) | 7.5±8.3                                                            | 7.2±3.2                | 3.0±2.0                                             | 1.7±2.0                |           | Point-B                               |
|                                            | Mandibular angle (CW)        | 11.8±9.9                                                           | 7.9±6.6                | 6.7±8.9                                             | 8.2±9.6                |           | Ar-Go-Gn                              |
|                                            | Mandibular angle (CCW)       | 4.5±3.2                                                            | 6.3±6.6                | 6.8±5.2                                             | 4.2±5.9                |           | Ar-Go-Gn                              |

| Study (first author, year)                    | Type of displacement         | Operative displacement (mean±SD or median (IQR), in mm or ° angle) |                      | Relapse (mean±SD or median (IQR), in mm or ° angle) |           | Follow-up | Lateral cephalometric reference marks |
|-----------------------------------------------|------------------------------|--------------------------------------------------------------------|----------------------|-----------------------------------------------------|-----------|-----------|---------------------------------------|
|                                               |                              | B                                                                  | T                    | B                                                   | T         |           |                                       |
| <b>Turvey et al. (2006)</b> [77]              | Mandibular horizontal        | 5.20±2.37                                                          | 4.96±2.60            | 0.54±3.25                                           | 0.33±2.2  | 1 yr      | Point-B                               |
|                                               | Mandibular vertical          | 4.34±1.68                                                          | 4.01±2.30            | 1.36±2.59                                           | 1.15±1.80 |           |                                       |
| <b>Ueki et al. (2006a and b)</b> [78]         | Maxillary horizontal (a)     | 2.9±2.3 <sup>a</sup>                                               | 3.1±2.9 <sup>a</sup> | 1.30±2.14                                           | 0.90±2.86 | 1 yr      | Point-A                               |
|                                               | Maxillary vertical (a)       | 0.8±2.0 <sup>a</sup>                                               | 0.4±1.8 <sup>a</sup> | 2.30±2.10                                           | 0.40±1.90 |           | Point-A                               |
|                                               | Maxillary angle (a)          | 2.7±1.4 <sup>a</sup>                                               | 3.1±1.6 <sup>a</sup> | 0.20±1.31                                           | 0.80±1.43 |           | SNA                                   |
|                                               | Maxillary horizontal (b)     | 1.7±2.7 <sup>a</sup>                                               | 2.8±1.7 <sup>a</sup> | 2.00±2.27                                           | 1.10±2.04 |           | Point-A                               |
|                                               | Maxillary vertical (b)       | 3.7±2.0 <sup>a</sup>                                               | 0.0±1.2 <sup>a</sup> | 3.30±2.15                                           | 2.00±1.39 |           | Point-A                               |
|                                               | Maxillary angle (b)          | 2.5±2.3 <sup>a</sup>                                               | 2.6±1.5 <sup>a</sup> | 0.40±1.92                                           | 1.10±1.61 |           | SNA                                   |
| <b>Landes et al. (2007)</b> [79] <sup>d</sup> | Maxillary horizontal (adv)   | 2.5±1.0                                                            | 5.4±3.5              | 1.2±0.8                                             | 2.4±2.0   | 1 yr      | Point-A                               |
|                                               | Maxillary horizontal (setb)  | 2.2±2.4                                                            | 1.9±1.8              | 1.8±1.9                                             | 2.5±1.7   |           | Point-A                               |
|                                               | Maxillary vertical (imp)     | 1.0±0.7                                                            | 3.3±2.7              | 1.1±1.1                                             | 2.2±1.5   |           | ANS                                   |
|                                               | Maxillary vertical (elong)   | 6.5±3.4                                                            | 3.7±5.2              | 2.0±1.4                                             | 3.1±3.6   |           | ANS                                   |
|                                               | Mandibular horizontal (adv)  | 5.5±3.7                                                            | 6.3±8.8              | 2.6±2.7                                             | 5.1±8.2   |           | Point-B                               |
|                                               | Mandibular horizontal (setb) | 11.2±7.7                                                           | 7.2±3.2              | 2.7±2.6                                             | 1.7±2.0   |           | Point-B                               |
|                                               | Mandibular angle (CW)        | 7.9±2.4                                                            | 7.9±6.6              | 2.4±2.7                                             | 8.2±9.6   |           | Ar-Go-Gn                              |
|                                               | Mandibular angle (CCW)       | 6.9±2.6                                                            | 6.3±6.6              | 7.0±5.4                                             | 4.2±5.9   |           | Ar-Go-Gn                              |
| <b>Choi et al. (2010)</b> [82]                | Mandibular horizontal (setb) | 7.11±2.7                                                           | 5.69±1.10            | 1.94±0.93                                           | 1.60±0.58 | 14.5 mos  | Point-B                               |
|                                               | Mandibular vertical (setb)   | 1.58±2.73                                                          | 1.81±1.44            | 0.08±1.38                                           | 0.10±1.10 |           | Point-B                               |
| <b>Ueki et al. (2011)</b> [83]                | Mandibular horizontal        | 5.0±7.2 <sup>e</sup>                                               | 5.1±6.9              | NNA                                                 |           | 1 yr      | Pg                                    |

| Study (first author, year) | Type of displacement         | Operative displacement (mean±SD or median (IQR), in mm or ° angle) |                      | Relapse (mean±SD or median (IQR), in mm or ° angle) |            | Follow-up | Lateral cephalometric reference marks |         |
|----------------------------|------------------------------|--------------------------------------------------------------------|----------------------|-----------------------------------------------------|------------|-----------|---------------------------------------|---------|
|                            |                              | B                                                                  | T                    | B                                                   | T          |           |                                       |         |
| Ballon et al. (2012)[84]   | Mandibular vertical          | 1.5±4.0 <sup>e</sup>                                               | 3.7±5.5              |                                                     |            | ≥6 mos    | Pg                                    |         |
|                            | Mandibular angle             | 3.2±5.4 <sup>e</sup>                                               | 2.4±3.2              |                                                     |            |           | Ar-Go-Gn                              |         |
|                            | Maxillary horizontal (adv)   | 2.70±1.94                                                          | 4.28±2.37            | 1.84±1.69                                           | 1.59±1.48  |           | Point-A                               |         |
|                            | Maxillary horizontal (setb)  | 3.46±2.63                                                          | 3.70±2.10            | 2.02±1.89                                           | 1.70±1.64  |           | Point-A                               |         |
|                            | Maxillary vertical (imp)     | 3.13±2.25                                                          | 3.25±1.55            | 2.67±2.08                                           | 1.40±1.42  |           | ANS                                   |         |
|                            | Maxillary vertical (elong)   | 5.22±4.05                                                          | 2.92±2.64            | 2.68±2.65                                           | 1.39±1.55  |           | ANS                                   |         |
|                            | Mandibular horizontal (adv)  | 4.89±3.67                                                          | 4.09±2.84            | 3.65±3.39                                           | 2.09±1.43  |           | Point-B                               |         |
|                            | Mandibular horizontal (setb) | 9.31±5.46                                                          | 8.55±4.85            | 4.86±2.87                                           | 1.05±1.31  |           | Point-B                               |         |
|                            | Mandibular angle (CW)        | 7.75±6.18                                                          | 9.57±7.13            | 4.55±3.52                                           | 10.63±9.47 |           | Ar-Go-Gn                              |         |
|                            | Mandibular angle (CCW)       | 4.79±3.09                                                          | 6.50±6.06            | 6.36±4.86                                           | 5.00±6.53  |           | Ar-Go-Gn                              |         |
|                            | Paeng et al. (2012)[6]       | Mandibular horizontal                                              | 6.7±2.2              | 7.0±3.2                                             | 0.51±1.23  | 0.75±1.85 | 6 mos                                 | Point-B |
|                            | Mandibular vertical          |                                                                    | NNA                  | 0.71±1.35                                           | 1.5±1.39   | Me        |                                       |         |
|                            | Ueki et al. (2012)[85]       | Maxillary horizontal                                               | 2.4±2.1 <sup>e</sup> | 2.7±2.6                                             | 0.30±1.25  | 0.50±1.99 | 1 yr                                  | Point-A |
|                            |                              | Maxillary vertical                                                 | 1.0±4.3 <sup>e</sup> | 0.8±2.9                                             | 1.00±1.36  | 1.20±1.45 |                                       | Point-A |
| Maxillary angle            |                              | 1.2±3.6 <sup>e</sup>                                               | 2.2±2.9              | 0.95±0.76                                           | 0.60±1.22  | SNA       |                                       |         |
| Blakey et al. (2014)[86]   | Maxillary horizontal         | 5.61±1.30                                                          | 7.07±2.30            | 2.06±1.91                                           | 1.34±1.34  | 1 yr      | Point-A                               |         |
| Lee et al. (2014)[87]      | Mandibular horizontal        | 13.97±1.39                                                         | 9.59±1.51            | 1.89±1.33                                           | 3.02±1.05  | 6 mos     | Pg                                    |         |
|                            | Mandibular vertical          | 1.7±1.68                                                           | 0.65±1.6             | 0.83±0.53                                           | 1.51±1.56  |           | Pg                                    |         |
|                            | Mandibular angle             | 3.57±1.06                                                          | 2.81±0.65            | 0.33±0.85                                           | 1.39±0.48  |           | Ar-Pg to FH                           |         |

Perioperative displacement and relapse are given in absolute values. The direction of operative displacement (e.g., setback or advancement) are only stated in this table whenever this was explicitly stated in the original manuscript. <sup>a</sup>Time interval values of cephalometric data (e.g., 1-year postoperative minus immediate postoperative data) were calculated based on the cephalometric data of specific time points (e.g., 1 year and immediate postoperative data), assuming normal distribution of data. <sup>b</sup>Discrepancy

exists between data in the text and tables of the original manuscript. The authors did not respond to contact attempts. Data presented in the text of the original manuscript were used. <sup>c</sup>Data presented as mean  $\pm$  standard error of the mean (SEM). <sup>d</sup>Landes et al. (2006) and Landes et al. (2007) have included the identical control groups. The means and standard deviations of both the intervention groups were pooled and analyzed as a single pair-wise comparison with that specific control group, assuming normal distribution of data. <sup>e</sup>The two subgroups of biodegradable osteosyntheses (i.e., uHA/PLLA and PLLA subgroups) were pooled and analyzed as a single pair-wise comparison between biodegradable and titanium osteosyntheses. a: subgroup Le Fort advancement + BSSO setback. b: subgroup Le Fort I advancement + IVRO without fixation. IQR, interquartile range; NNA, numbers not available; Go, gonion; Ar-Go-Gn, articular-gonion-gnathion angle (gonial angle); AI, anterior implant; NS, nasion-sella line; NSP, nasion-sella perpendicular line; OP, occlusal plane; Pg, pogonion; SNA, sella-nasion-A point angle; adv, advancement; setb, setback; imp, impaction; elong, elongation; ANS, anterior nasal spine; CW, clockwise rotation; CCW, counter-clockwise rotation; Me, menton; Ar-Pg, articular-pogonion; FH, Frankfurt horizontal plane; wks, weeks; mos, months; yrs, years.

**Table S7:** Results of univariable meta-regression analyses to analyze the effect of risk of bias items on the log risk ratio of symptomatic device removal using a random effects model.

| <b>Risk of bias item</b>                  | <b>Regression coefficient</b> | <b>95% CI (lower to upper border)</b> | <b>P-value</b> |
|-------------------------------------------|-------------------------------|---------------------------------------|----------------|
| <b>Domain 1 (ref. = low RoB)</b>          | 0.64                          | -0.15 to 1.43                         | 0.11           |
| Some concerns                             | -0.56                         | -1.74 to 0.61                         | 0.35           |
| High RoB                                  | -2.23                         | -5.40 to 0.94                         | 0.35           |
| <b>Domain 2 (ref. = low RoB)</b>          | -0.06                         | -0.91 to 0.79                         | 0.89           |
| High RoB                                  | 0.70                          | -0.50 to 1.90                         | 0.25           |
| <b>Domain 3 (ref. = low RoB)</b>          | -0.31                         | -1.68 to 1.06                         | 0.65           |
| Some concerns                             | 0.34                          | -2.00 to 2.69                         | 0.78           |
| High RoB                                  | 0.80                          | -1.87 to 3.48                         | 0.56           |
| <b>Domain 4 (ref. = low RoB)</b>          | -0.46                         | -1.71 to 0.79                         | 0.47           |
| Some concerns                             | 1.15                          | -1.40 to 3.70                         | 0.38           |
| High RoB                                  | 0.95                          | -1.63 to 3.54                         | 0.47           |
| <b>Domain 5 (ref. = low RoB)</b>          | 0.42                          | -0.11 to 0.96                         | 0.12           |
| Some concerns                             | -2.01                         | -5.10 to 1.07                         | 0.20           |
| <b>Overall RoB (ref. = some concerns)</b> | -0.18                         | -1.29 to 0.93                         | 0.75           |
| High RoB                                  | 0.64                          | -0.71 to 2.00                         | 0.35           |

*RoB, Risk of Bias. Ref., reference item. 95% CI, 95% confidence interval. The meta-regression analysis shows none of the individual risk of bias items have a significant effect on the symptomatic device removal rate.*



**Table S8:** Input and results of the trial sequential analyses using the random-effects (DerSimonian-Laird) model with the corresponding interpretations.

| Endpoint                            | Control event proportion (titanium) <sup>a</sup> | Relative risk (95% CI) <sup>a</sup> | Diversity (D <sup>2</sup> ) <sup>a</sup> | Total N/RIS             | Crossed conventional test boundary       | Crossed O'Brien-Fleming boundary | Crossed futility boundary | Interpretation                          |
|-------------------------------------|--------------------------------------------------|-------------------------------------|------------------------------------------|-------------------------|------------------------------------------|----------------------------------|---------------------------|-----------------------------------------|
| <b>Short-term follow-up</b>         |                                                  |                                     |                                          |                         |                                          |                                  |                           |                                         |
| <b>Infection</b>                    | 4.3%                                             | 1.03 (0.46; 2.28)                   | 0.0                                      | 645/780586 <sup>b</sup> | Not estimable due to <5% of RIS achieved |                                  |                           | Inconclusive, potentially false neutral |
| <b>Swelling</b>                     | 13.2%                                            | 1.51 (0.68; 3.38)                   | 0.62                                     | 255/2536                | No                                       | No                               | No                        | Inconclusive, potentially false neutral |
| <b>Dehiscence</b>                   | 2.3%                                             | 1.53 (0.52; 4.50)                   | 0.0                                      | 421/5865                | No                                       | No                               | No                        | Inconclusive, potentially false neutral |
| <b>Intermediate follow-up</b>       |                                                  |                                     |                                          |                         |                                          |                                  |                           |                                         |
| <b>Mobility bone segments</b>       | 10.3%                                            | 1.37 (0.47; 3.99)                   | 0.0                                      | 155/2302                | No                                       | No                               | No                        | Inconclusive, potentially false neutral |
| <b>Long-term follow-up</b>          |                                                  |                                     |                                          |                         |                                          |                                  |                           |                                         |
| <b>Malocclusion</b>                 | 11.2%                                            | 0.93 (0.39; 2.26)                   | 0.0                                      | 217/49794 <sup>b</sup>  | Not estimable due to <5% of RIS achieved |                                  |                           | Inconclusive, potentially false neutral |
| <b>Swelling</b>                     | 2.0%                                             | 2.42 (0.52; 11.19)                  | 0.0                                      | 178/1316                | No                                       | No                               | No                        | Inconclusive, potentially false neutral |
| <b>Palpability of screws/plates</b> | 23.2%                                            | 0.38 (0.11; 1.28)                   | 0.67                                     | 400/619                 | No                                       | No                               | No                        | Inconclusive, potentially false neutral |

| Overall follow-up                            |      |                   |      |           |    |    |    |                                         |
|----------------------------------------------|------|-------------------|------|-----------|----|----|----|-----------------------------------------|
| <b>Symptomatic device removal</b>            | 8.3% | 1.29 (0.68; 2.44) | 0.52 | 777/9717  | No | No | No | Inconclusive, potentially false neutral |
| <b>Revision surgery (not device removal)</b> | 2.0% | 1.40 (0.37; 5.34) | 0.0  | 377/11445 | No | No | No | Inconclusive, potentially false neutral |

*RIS, required information size. <sup>a</sup>According to the observed relative risk and diversity of the present meta-analysis including randomised controlled trials only. <sup>b</sup>RIS is very high due to a very small relative risk reduction. Outcomes that are not mentioned were assessed in no or a single randomised controlled trials, or were only assessed in total zero-event trials.*

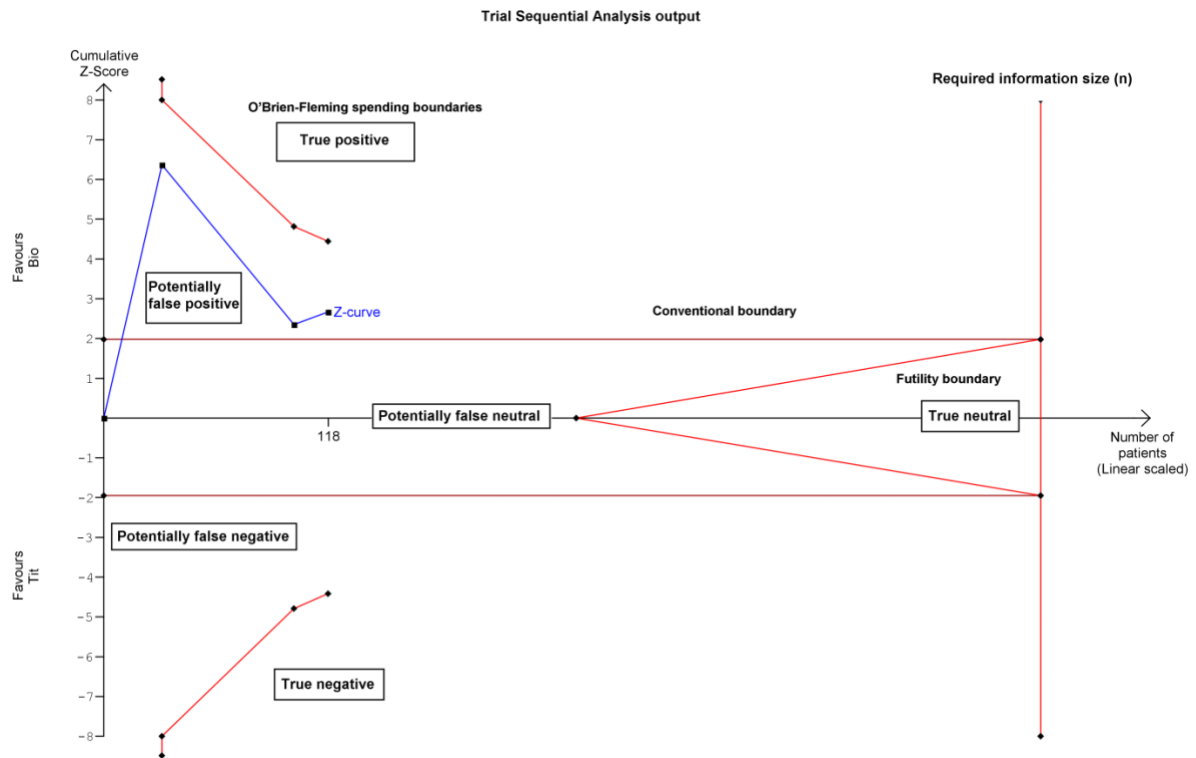

**Figure S1:** Example graph with explanation of the trial sequential analysis. The y-axis represents the cumulative Z-score and the x-axis the number of patients of included trials. A Z-score of  $\pm 1.96$  corresponds to  $\alpha = 0.05$  (conventional boundaries). The required information size is the number of patients needed to draw a definite conclusion and this number is comparable to a sample size calculation in randomised controlled trials. The O'Brien-Fleming spending boundaries are trial sequential adjusted boundaries; the fewer patients are randomised, the wider these borders are due to increased chance of random errors. Crossing the futility boundary indicates that the intervention is unlikely to have the anticipated effect. The interpretation of each area is presented as textboxes in the graph. Thus, TSA provides three borders: conventional test boundaries ( $\alpha = 0.05$ ;  $Z = \pm 1.96$ ; i.e., crossing boundary means potentially false positive or negative), O'Brien-Fleming spending boundaries (i.e., crossing boundary means true positive or negative effect), and futility boundaries (crossing boundary means true neutral effect). If no boundaries are crossed, the evidence remain inconclusive (i.e., potentially false neutral).

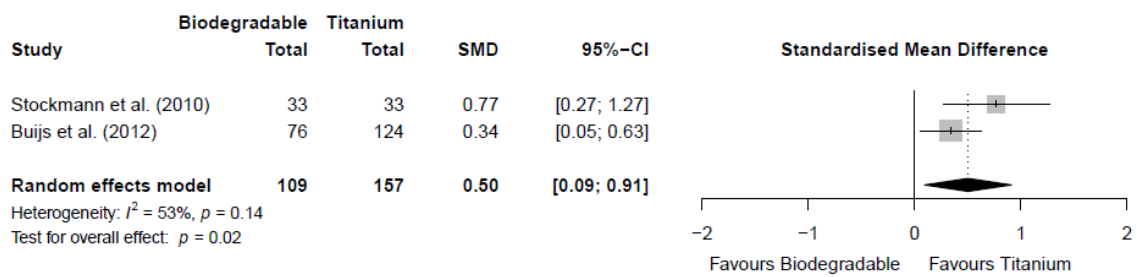

**Figure S2:** Forest plot of the endpoint operative time in minutes. *SMD*, standardised mean difference; *95%-CI*, 95% confidence interval.

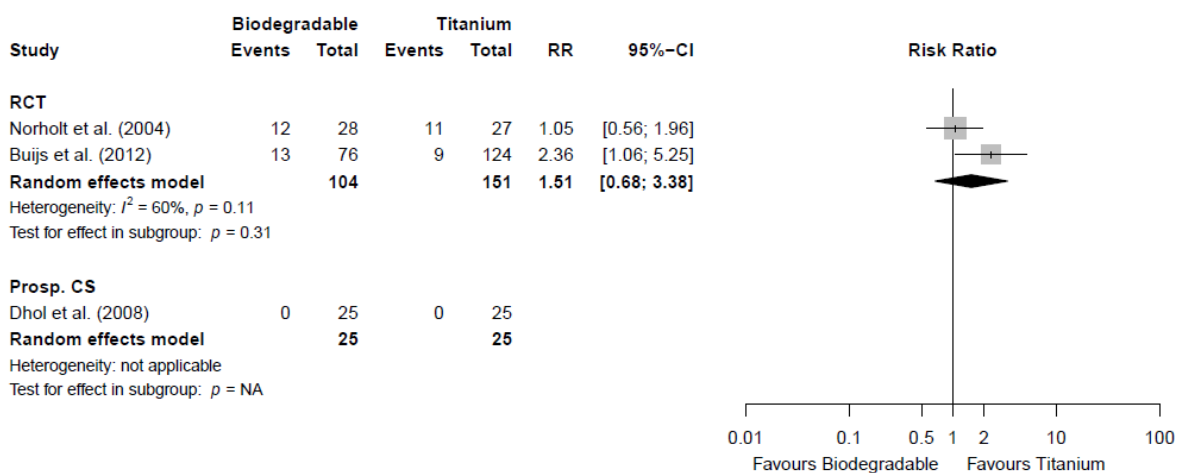

**Figure S3:** Forest plot of the endpoint swelling (<4 weeks follow-up) stratified by study design. *RCT*, randomised controlled trials; *Prosp. CS*, prospective cohort studies; *RR*, risk ratio; *95%-CI*, 95% confidence interval.

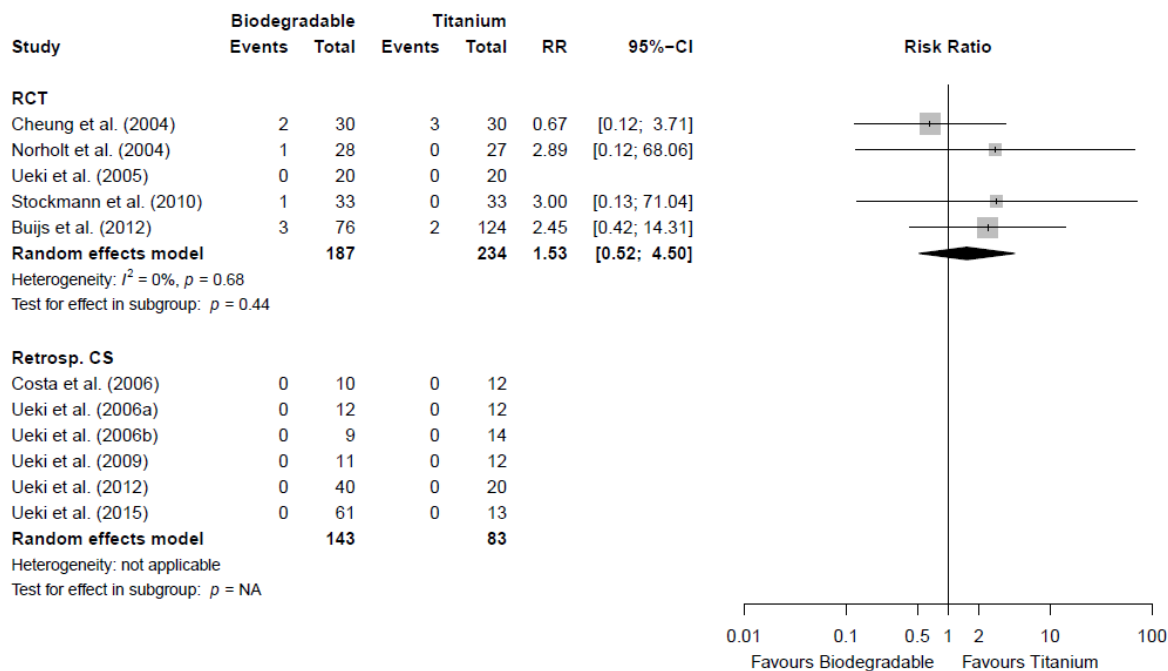

**Figure S4:** Forest plot of the endpoint dehiscence (<4 weeks follow-up) stratified by study design. *RCT*, randomised controlled trials; *Retrosp. CS*, retrospective cohort studies; *RR*, risk ratio; *95%-CI*, 95% confidence interval.

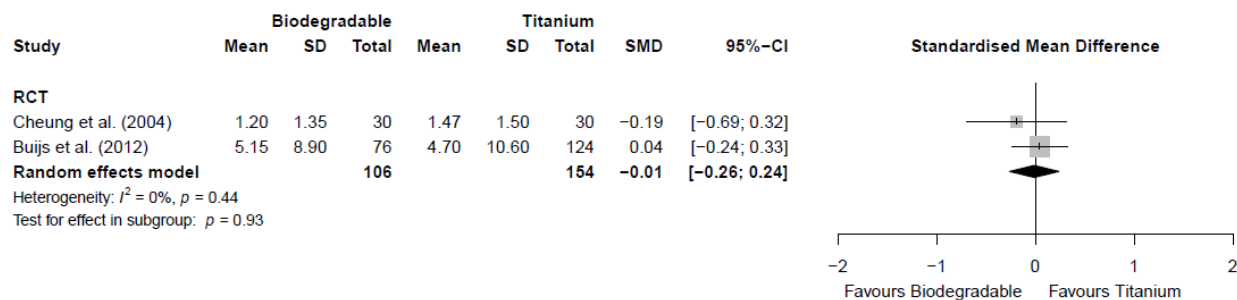

**Figure S5:** Forest plot of the endpoint pain (6-12 weeks follow-up) stratified by study design. *RCT*, randomised controlled trials; *SMD*, standardised mean difference; *95%-CI*, 95% confidence interval.

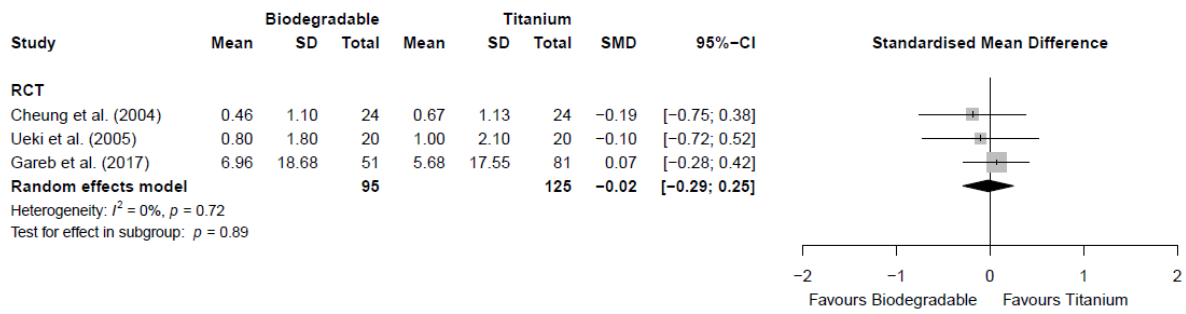

**Figure S6:** Forest plot of the endpoint pain (>12 weeks follow-up) stratified by study design. *RCT*, randomised controlled trials; *SMD*, standardised mean difference; *95%-CI*, 95% confidence interval.

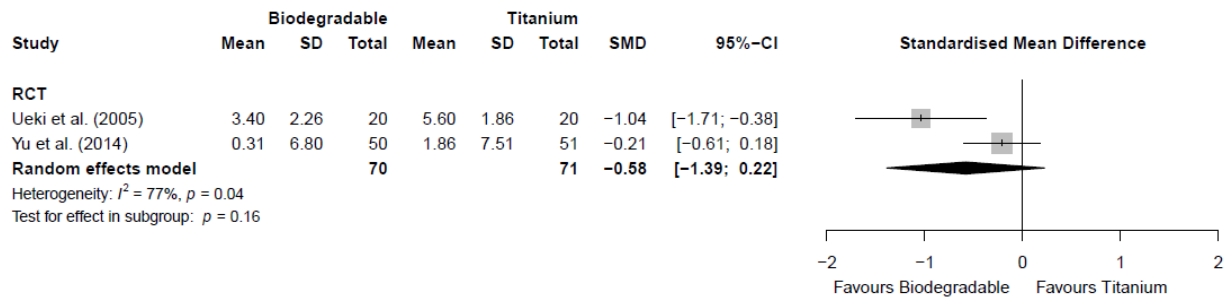

**Figure S7:** Forest plot of the endpoint maximum mouth opening (>12 weeks follow-up) stratified by study design. *RCT*, randomised controlled trials; *SMD*, standardised mean difference; *95%-CI*, 95% confidence interval.

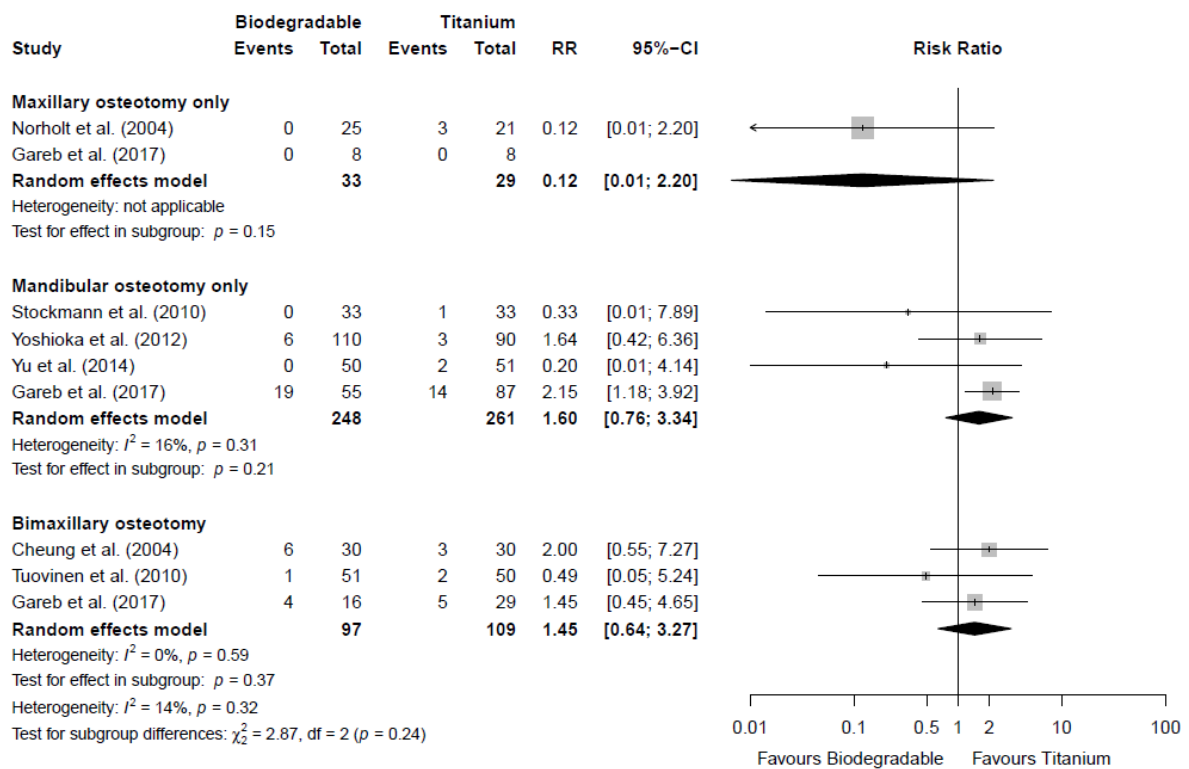

**Figure S8:** Forest plot of the endpoint symptomatic device removal (overall follow-up) of studies stratified maxillary, mandibular, and bimaxillary osteotomies. *RR*, risk ratio; *95%-CI*, 95% confidence interval.

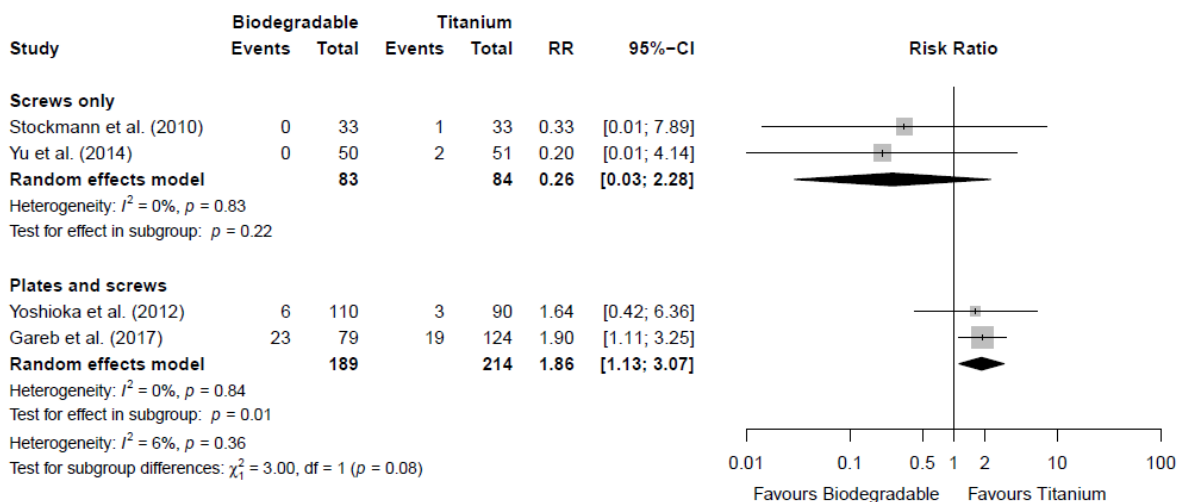

**Figure S9:** Forest plot of the endpoint symptomatic device removal (overall follow-up) of studies including osteosynthesis by plates and screws versus only screws. *RR*, risk ratio; *95%-CI*, 95% confidence interval.

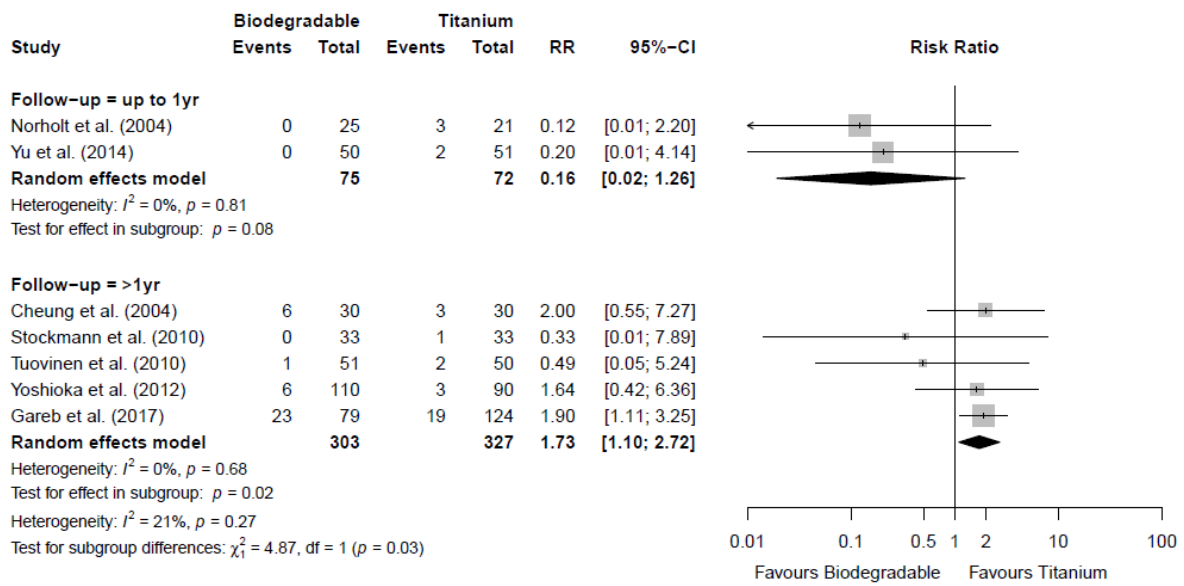

**Figure S10:** Forest plot of the endpoint symptomatic device removal (overall follow-up) stratified by  $\leq 1$ -year and  $> 1$ -year follow-up. RR, risk ratio; 95%-CI, 95% confidence interval.

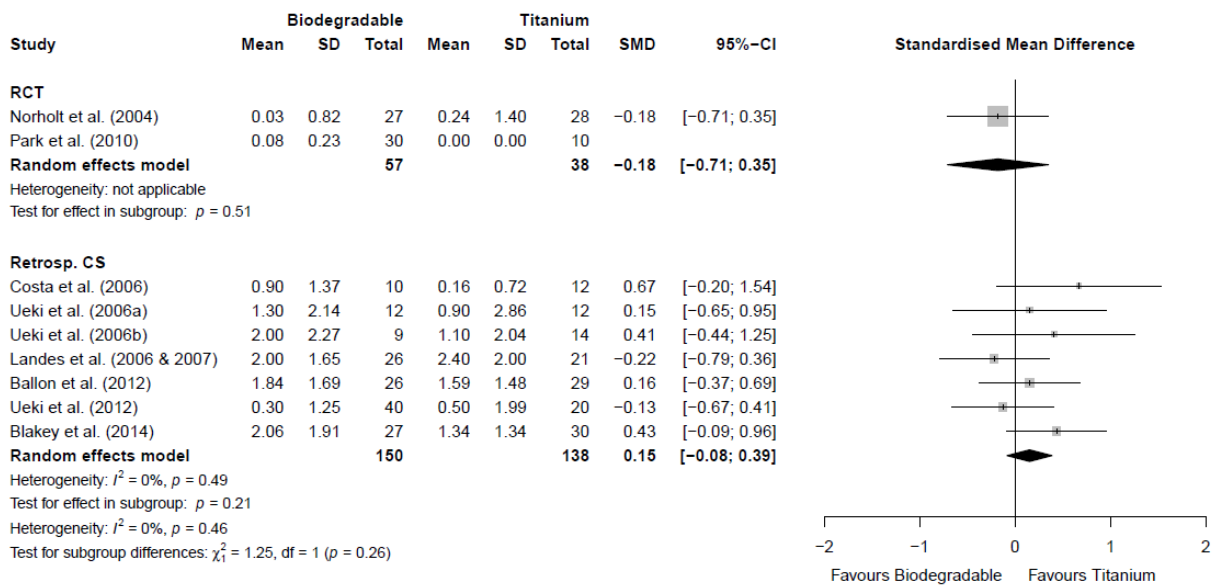

**Figure S11:** Forest plot of the endpoint maxillary horizontal relapse after maxillary advancement stratified by study design (overall follow-up). RCT, randomised controlled trials; Retros. CS, retrospective cohort studies; SMD, standardised mean difference; 95%-CI, 95% confidence interval.



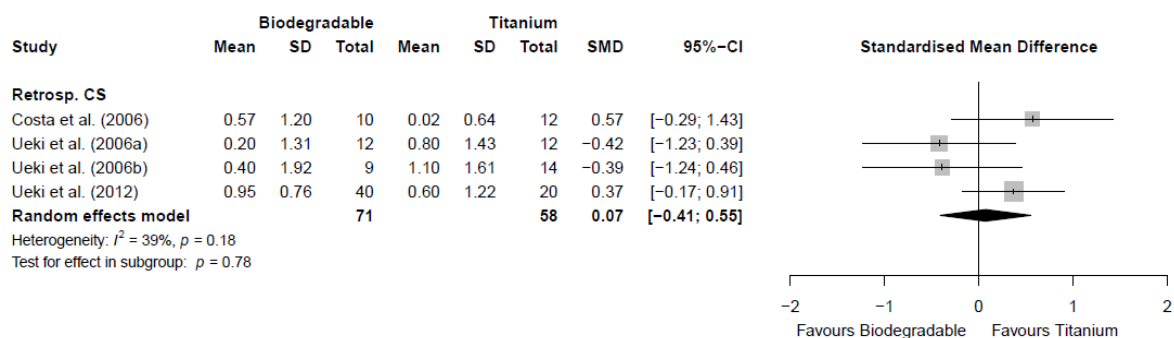

**Figure S12:** Forest plot of the endpoint maxillary angular relapse after maxillary advancement stratified by study design (overall follow-up). *Retros. CS*, retrospective cohort studies; *SMD*, standardised mean difference; *95%-CI*, 95% confidence interval.

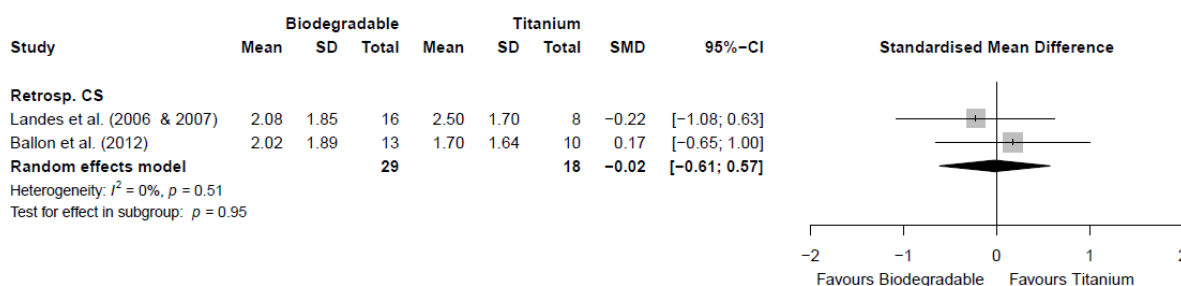

**Figure S13:** Forest plot of the endpoint maxillary horizontal relapse after maxillary setback stratified by study design (overall follow-up). *Retros. CS*, retrospective cohort studies; *SMD*, standardised mean difference; *95%-CI*, 95% confidence interval.

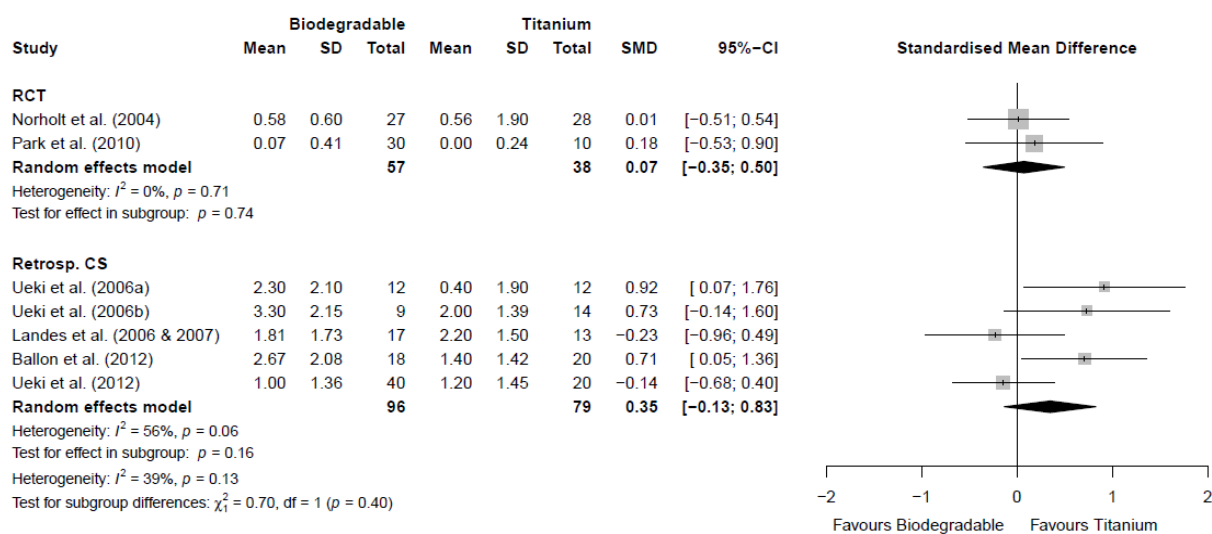

**Figure S14:** Forest plot of the endpoint maxillary vertical relapse after maxillary impaction stratified by study design (overall follow-up). *RCT*, randomised controlled trials; *Retros. CS*, retrospective cohort studies; *SMD*, standardised mean difference; *95%-CI*, 95% confidence interval.

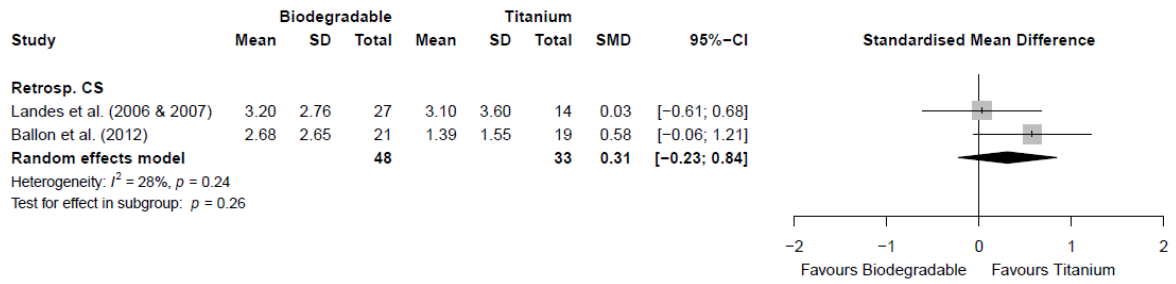

**Figure S15:** Forest plot of the endpoint maxillary vertical relapse after maxillary elongation stratified by study design (overall follow-up). *Retros. CS*, retrospective cohort studies; *SMD*, standardised mean difference; *95%-CI*, 95% confidence interval.

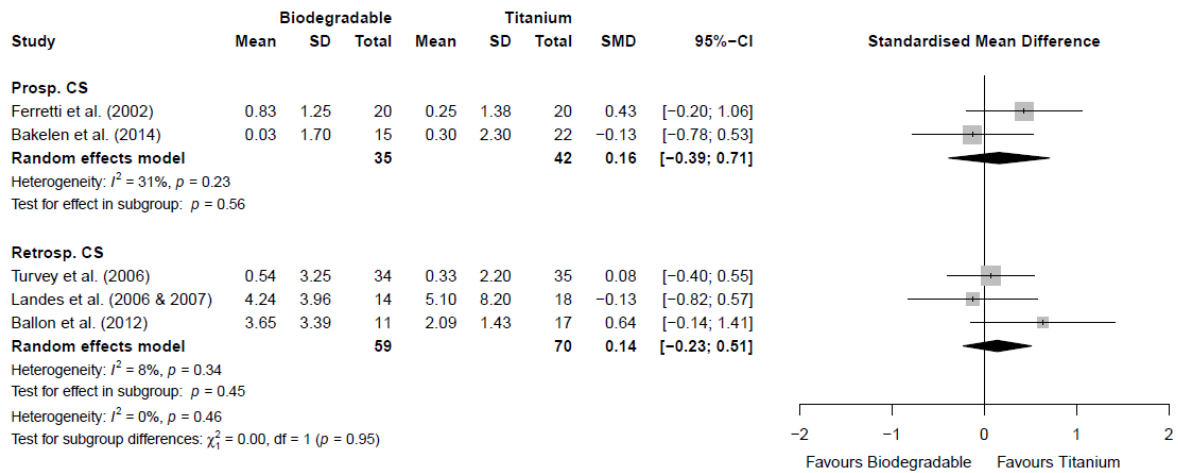

**Figure S16:** Forest plot of the endpoint mandibular horizontal relapse after mandibular advancement stratified by study design (overall follow-up). *Prosp. CS*, prospective cohort studies; *Retros. CS*, retrospective cohort studies; *SMD*, standardised mean difference; *95%-CI*, 95% confidence interval.

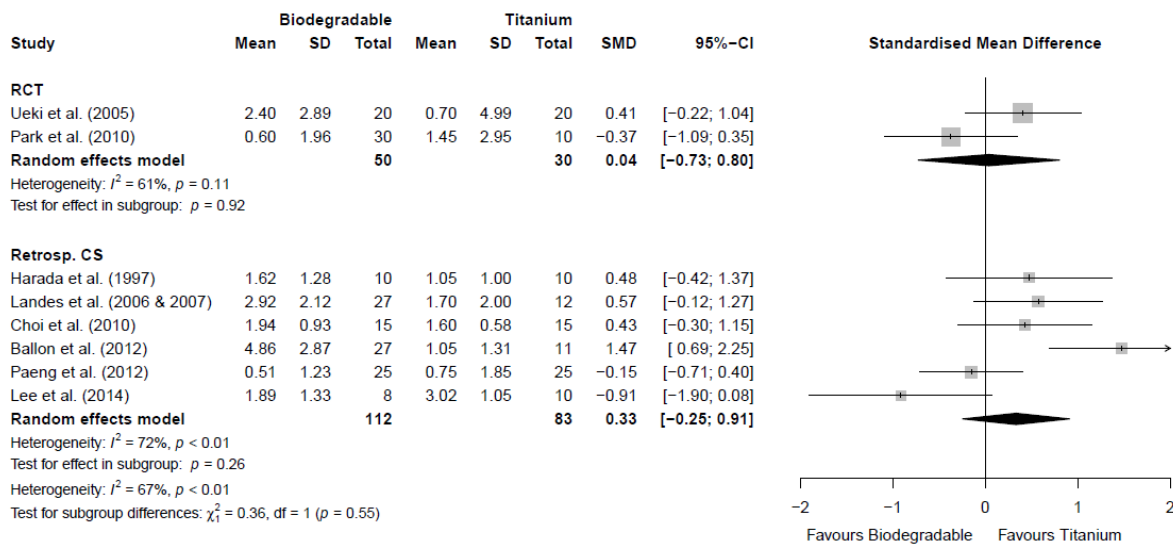

**Figure S17:** Forest plot of the endpoint mandibular horizontal relapse after mandibular setback stratified by study design (overall follow-up). *RCT*, randomised controlled trials; *Retros. CS*, retrospective cohort studies; *SMD*, standardised mean difference; *95%-CI*, 95% confidence interval.

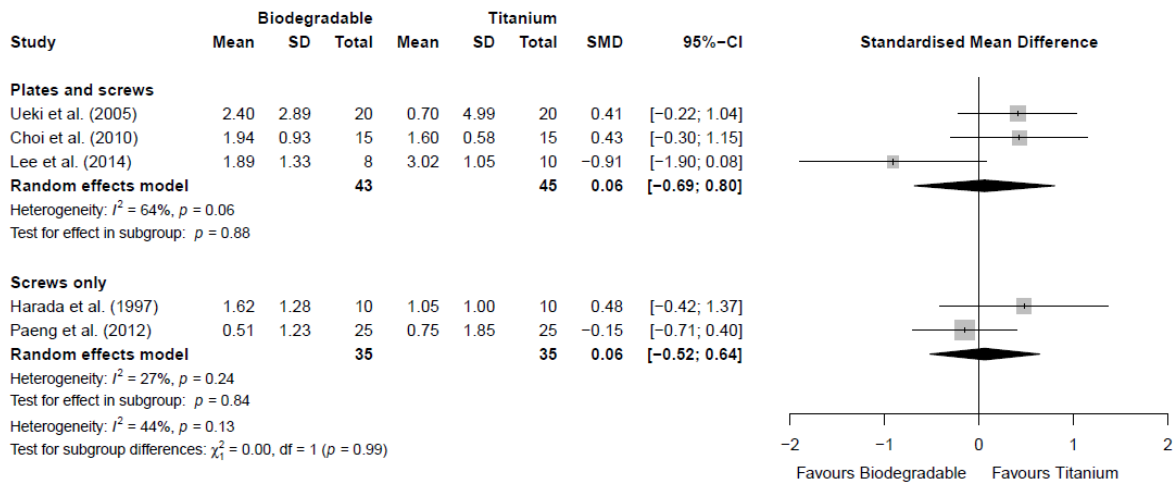

**Figure S18:** Forest plot of the endpoint mandibular horizontal relapse after mandibular setback of studies including osteosynthesis by plates and screws versus only screws (overall follow-up). *SMD*, standardised mean difference; *95%-CI*, 95% confidence interval.

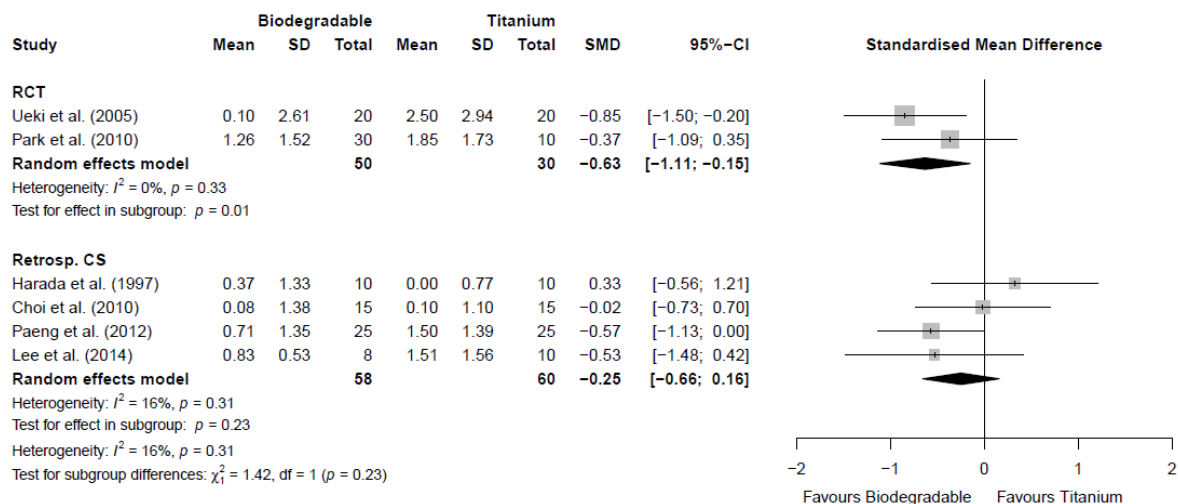

**Figure S19:** Forest plot of the endpoint mandibular vertical relapse after mandibular setback stratified by study design (overall follow-up). *RCT*, randomised controlled trials; *Retrospective CS*, retrospective cohort studies; *SMD*, standardised mean difference; *95%-CI*, 95% confidence interval.

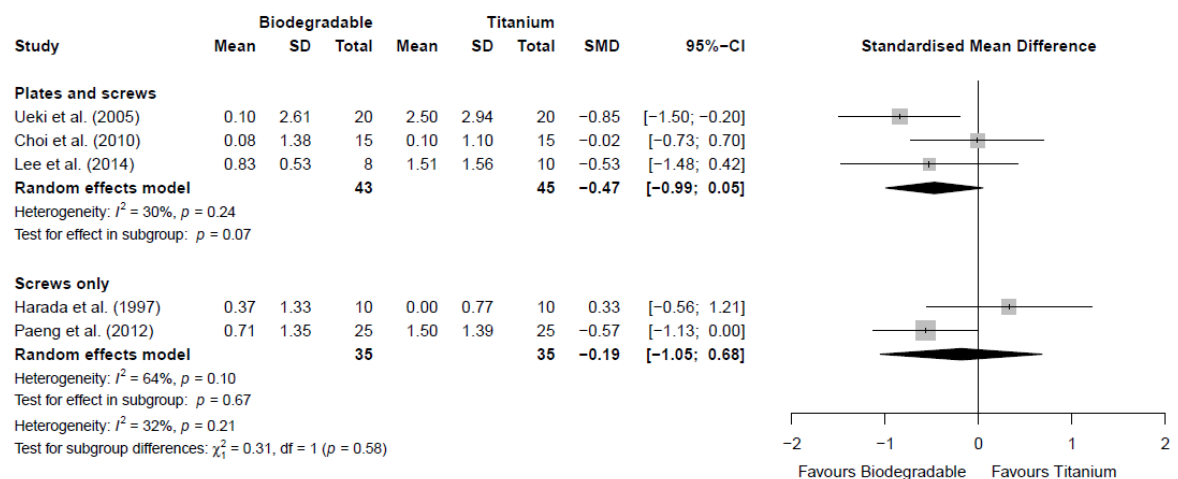

**Figure S20:** Forest plot of the endpoint mandibular vertical relapse after mandibular setback of studies including osteosynthesis by plates and screws versus only screws (overall follow-up). *SMD*, standardised mean difference; *95%-CI*, 95% confidence interval.

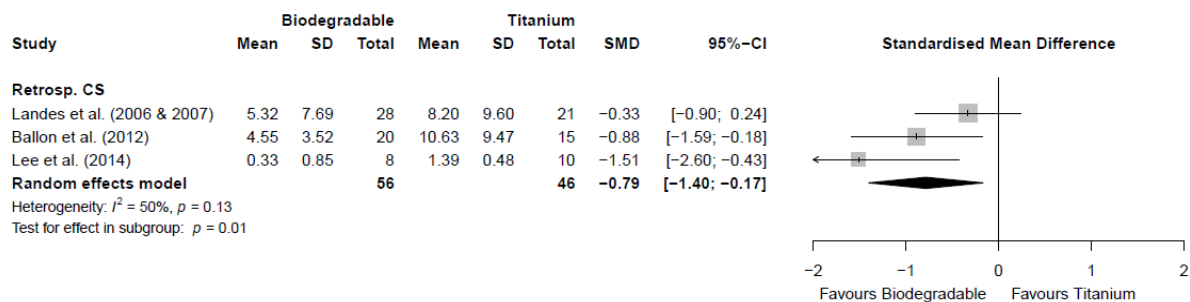

**Figure S21:** Forest plot of the endpoint mandibular angular relapse after mandibular clockwise rotation stratified by study design (overall follow-up). *Retros. CS*, retrospective cohort studies; *SMD*, standardised mean difference; *95%-CI*, 95% confidence interval.

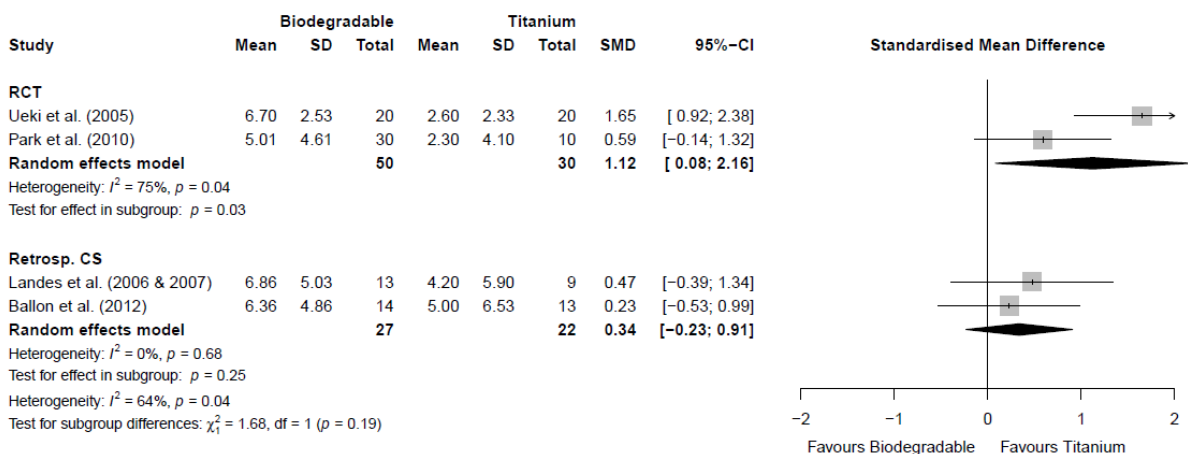

**Figure S22:** Forest plot of the endpoint mandibular angular relapse after mandibular counter clockwise rotation stratified by study design (overall follow-up). *RCT*, randomised controlled trials; *Retros. CS*, retrospective cohort studies; *SMD*, standardised mean difference; *95%-CI*, 95% confidence interval.

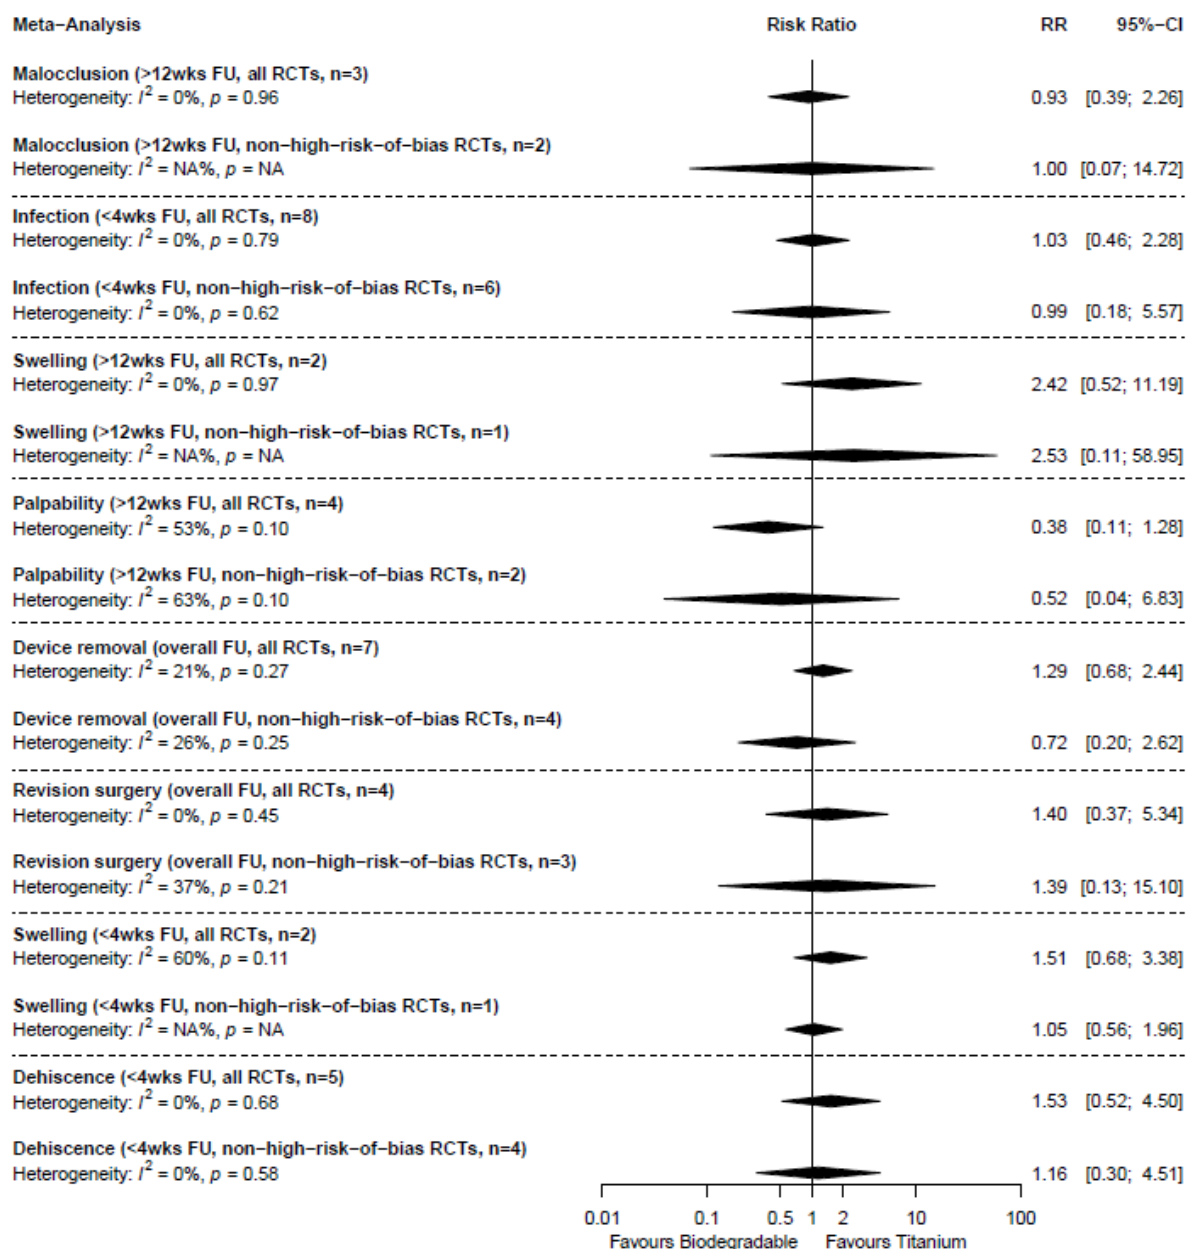

**Figure S23:** Sensitivity analysis with summary risk ratios for all pooled outcomes according to the inclusion of all randomized controlled trials and non-high-risk-of-bias RCTs only. *RCT*, randomised controlled trials; *RR*, risk ratio; *95%-CI*, 95% confidence interval.

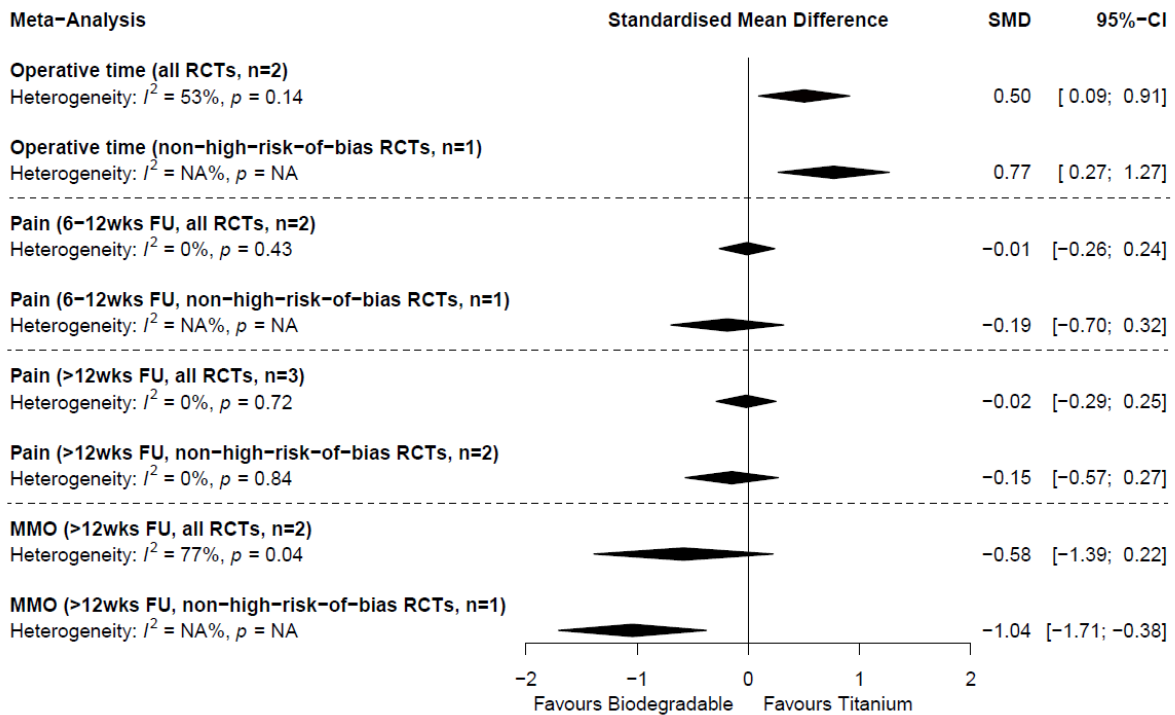

**Figure S24:** Sensitivity analysis with summary standardized mean differences for all pooled outcomes according to the inclusion of all randomized controlled trials and non-high-risk-of-bias RCTs only. *RCT*, randomised controlled trials; *SMD*, standardised mean difference; *95%-CI*, 95% confidence interval.

## References

- [1] Matthews NS, Khambay BS, Ayoub AF, Koppel D, Wood G. Preliminary assessment of skeletal stability after sagittal split mandibular advancement using a bioresorbable fixation system. *Br J Oral Maxillofac Surg* 2003;41:179–84. [https://doi.org/10.1016/S0266-4356\(03\)00048-2](https://doi.org/10.1016/S0266-4356(03)00048-2).
- [2] Cheung LK, Yip IHS, Chow RLK. Stability and morbidity of Le Fort I osteotomy with bioresorbable fixation: a randomized controlled trial. *Int J Oral Maxillofac Surg* 2008;37:232–41. <https://doi.org/10.1016/j.ijom.2007.09.169>.
- [3] Stockmann P, Böhm H, Driemel O, Mühling J, Pistner H. Resorbable versus titanium osteosynthesis devices in bilateral sagittal split ramus osteotomy of the mandible - The results of a two centre randomised clinical study with an eight-year follow-up. *J Cranio-Maxillofacial Surg* 2010;38:522–8. <https://doi.org/10.1016/j.jcms.2010.01.002>.
- [4] Tuovinen V, Suuronen R, Teittinen M, Nurmenniemi P. Comparison of the stability of bioabsorbable and titanium osteosynthesis materials for rigid internal fixation in orthognathic surgery. A prospective randomized controlled study in 101 patients with 192 osteotomies. *Int J Oral Maxillofac Surg* 2010;39:1059–65. <https://doi.org/10.1016/j.ijom.2010.07.012>.

- [5] Landes CA, Ballon A. Skeletal stability in bimaxillary orthognathic surgery: P(L/DL)LA-resorbable versus titanium osteofixation. *Plast Reconstr Surg* 2006;118:703–21. <https://doi.org/10.1097/01.prs.0000232985.05153.bf>.
- [6] Paeng JY, Hong J, Kim CS, Kim MJ. Comparative study of skeletal stability between bicortical resorbable and titanium screw fixation after sagittal split ramus osteotomy for mandibular prognathism. *J Cranio-Maxillofacial Surg* 2012;40:660–4. <https://doi.org/10.1016/j.jcms.2011.11.001>.
- [7] Ahmed W, Bukhari SGA, Janjua OS, Luqman U, Shah I, W. A, et al. Bioresorbable versus titanium plates for mandibular fractures. *J Coll Physicians Surg Pakistan* 2013;23:480–3. <https://doi.org/07.2013/JCPSP.480483>.
- [8] Arshad R, Muddassar M, Rabbani M, Ahmed S, Durrani AU, Gulfam F. Comparative Study of Titanium Micro Plates Versus Bioresorbable Plates In The Osteosynthesis of Isolated Zygomatic Bone Fractures. *Ann Dent Spec* 2019;7:4–10.
- [9] Arya S, Bhatt K, Bhutia O, Roychoudhury A. Efficacy of bioresorbable plates in the osteosynthesis of linear mandibular fractures. *Natl J Maxillofac Surg* 2020;11:98. [https://doi.org/10.4103/njms.njms\\_54\\_19](https://doi.org/10.4103/njms.njms_54_19).
- [10] Bekal M, Brijesh K, Suresha KR. Non-randomised controlled trial comparing the effectiveness of bioresorbable plates versus titanium miniplates in the management of mandibular fractures under general anaesthesia. *J Evol Med Dent Sci* 2017;6:6286–92.
- [11] Bell RB, Kindsfater CS. The use of biodegradable plates and screws to stabilize facial fractures. *J Oral Maxillofac Surg* 2006;64:31–9. <https://doi.org/10.1016/j.joms.2005.09.010>.
- [12] Bhatt K, Roychoudhury A, Bhutia O, Trikha A, Seith A, Pandey RM. Equivalence randomized controlled trial of bioresorbable versus titanium miniplates in treatment of mandibular fracture: A pilot study. *J Oral Maxillofac Surg* 2010;68:1842–8. <https://doi.org/10.1016/j.joms.2009.09.005>.
- [13] Bhatt K, Arya S, Bhutia O, Pandey S, Roychoudhury A. Retrospective study of mandibular angle fractures treated with three different fixation systems. *Natl J Maxillofac Surg* 2015;6:31. <https://doi.org/10.4103/0975-5950.168229>.
- [14] Böhm H, Pistner H, Barth T, Reuther J, Mühling J. Bioresorbierbare Schrauben im Vergleich zu Titanschrauben für die Osteosynthese nach sagittaler Spaltung des Unterkiefers - Eine prospektive, randomisierte, kontrollierte klinische Studie. *Biomed Tech* 1998;Band 43 :4–7.
- [15] Bouletreau P, Jurdic P, Mazoorana M, Breton P, Freidel M. Evaluation of tissue response to resorbable osteosynthesis materials in maxillofacial surgery. *Rev Stomatol Chir Maxillofac* 2005;106:316–20.
- [16] Burlini D, Conti G, Amadori F, Bardellini E, De Giuli C. Management of paediatric maxillofacial



- fractures: Conventional methods and resorbable materials. *Eur J Paediatr Dent* 2015;16:24–8.
- [17] Champy M, Blez P, Kahn J. [Osteosynthesis using resorbable plates in maxillofacial surgery - hopes and disappointments]. *Chirurgie* 1992;118:596–600.
- [18] Wang JK, Eun SC, Heo CY, Baek RM, Minn KW. The Result of Mandible Fracture Fixations with Biodegradable Materials. *J Korean Cleft Palate-Craniofacial Assoc* 2013;9:45–50.
- [19] Fakourand SR, Ladez MAR. Evaluation of the use of Self-reinforced Absorbable versus Metallic Plates and Screws in the Fractures of Symphysis and Parasymphysis Area. *Life Sci Journal-Acta Zhengzhou Univ Overseas Ed* 2012;9:1538–42.
- [20] Taylan Filinte G, Akan IM, Aycicek Cardak GN, Ozkaya Mutlu O, Akoz T. The Dilemma Of Pediatric Mandible Fractures: Resorbable Or Metallic Plates? *Turkish J Trauma Emerg Surg* 2015;21:3–7. <https://doi.org/10.5505/tjtes.2015.23922>.
- [21] Fuente del Campo A, Pohjonen T, Tormala P, Waris T. Fixation of horizontal maxillary osteotomies with biodegradable self-reinforced absorbable polylactide plates: preliminary results. *Eur J Plast Surg* 1996;19:7–9. <https://doi.org/10.1007/BF00209782>.
- [22] Hashiba Y, Ueki K, Marukawa K, Shimada M, Yoshida K, Shimizu C, et al. A comparison of lower lip hypoesthesia measured by trigeminal somatosensory-evoked potential between different types of mandibular osteotomies and fixation. *Oral Surgery, Oral Med Oral Pathol Oral Radiol Endodontology* 2007;104:177–85. <https://doi.org/10.1016/j.tripleo.2006.11.038>.
- [23] Ho MW, Boyle MA, Cooper JC, Dodd MD, Richardson D. Surgical complications of segmental le Fort i osteotomy. *Br J Oral Maxillofac Surg* 2011;49:562–6. <https://doi.org/10.1016/j.bjoms.2010.09.018>.
- [24] Hwang DSD, Lee HGH, Shin SSH, Kim UK. Evaluation of Intersegmental Displacement After Mandibular Setback Split Ramus Osteotomy Using Modified L-Shaped Monocortical Plate: Cone-Beam Computed Tomography Superimposition. *J Craniofac Surg* 2017;00:1–6. <https://doi.org/10.1097/SCS.0000000000004161>.
- [25] Iatrou I, Theologie-Lygidakis N, Tzerbos F. Surgical protocols and outcome for the treatment of maxillofacial fractures in children: 9 years' experience. *J Cranio-Maxillofacial Surg* 2010;38:511–6. <https://doi.org/10.1016/j.jcms.2010.02.008>.
- [26] Illi O, Sailer H, Stauffer U. [Preliminary of biodegradable osteosynthesis in craniofacial surgery of infants and children]. *Chir Pédiatr* 1989;30:284–7.
- [27] M.J. I, V.L. S. Resorbable internal fixation in pediatric cranial base surgery. *Laryngoscope* 2002;112:1897–901.
- [28] Janickova M, Statelova D, Mikuskova K, Jesenak M, Malachovsky I. Biodegradable versus

- titanium plates and screws for paediatric facial skeleton fractures. *Bratislava Med J* 2018;119:554–9.
- [29] Kallela I. [Rigid internal fixation of the mandible using biodegradable polylactide screws and metal screws a clinical and experimental study]. *Ann Chir Gynaecol* 1999;88:330–1.
- [30] Kang IG, Jung JH, Kim ST, Choi JY, Sykes JM. Comparison of titanium and biodegradable plates for treating midfacial fractures. *J Oral Maxillofac Surg* 2014;72:762.e1-762.e4. <https://doi.org/10.1016/j.joms.2013.12.020>.
- [31] Kim DY, Sung IY, Cho YC, Park E ji, Son JH. Bioabsorbable plates versus metal miniplate systems for use in endoscope-assisted open reduction and internal fixation of mandibular subcondylar fractures. *J Cranio-Maxillofacial Surg* 2018;46:398–412. <https://doi.org/10.1016/j.jcms.2017.12.026>.
- [32] Kobayashi M, Nakajima T, Yuu. [Clinical cases using absorbable plates in cranio-maxillo-facial surgery]. *Keisei-Geka* 2004;47:1079.
- [33] Kretschmer WB, Baciut G, Baciut M, Zoder W, Wangerin K. Transverse stability of 3-piece Le Fort I osteotomies. *J Oral Maxillofac Surg* 2011;69:861–9. <https://doi.org/10.1016/j.joms.2010.05.024>.
- [34] Landes CA, Ballon A, Tran A, Ghanaati S, Sader R. Segmental stability in orthognathic surgery: Hydroxyapatite/Poly-l-lactide osteoconductive composite versus titanium miniplate osteosyntheses. *J Cranio-Maxillofacial Surg* 2014;42:930–42. <https://doi.org/10.1016/j.jcms.2014.01.013>.
- [35] Landes C, Hoefler S, Richards T, Walcher F, Sader R. Perspectives of patients about bioabsorbable internal fixation for maxillofacial fractures. *Ann Maxillofac Surg* 2015;5:185. <https://doi.org/10.4103/2231-0746.175769>.
- [36] Lee H-B Bin, Oh J-SS, Kim S-GG, Kim H-KK, Moon S-YY, Kim Y-KK, et al. Comparison of titanium and biodegradable miniplates for fixation of mandibular fractures. *J Oral Maxillofac Surg* 2010;68:2065–9. <https://doi.org/10.1016/j.joms.2009.08.004>.
- [37] Lee GT, Jung HD, Kim SY, Park HS, Jung YS. The stability following advancement genioplasty with biodegradable screw fixation. *Br J Oral Maxillofac Surg* 2014;52:363–8. <https://doi.org/10.1016/j.bjoms.2013.12.009>.
- [38] Lee JH, Kim SM, Lee BK, Jeon JH, Kim MJ. 3D vector analysis of mandibular condyle stability in mandibular setback surgery with bicortical bioabsorbable screw fixation. *J Cranio-Maxillofacial Surg* 2014;42:e105–10. <https://doi.org/10.1016/j.jcms.2013.07.005>.
- [39] Leno MB, Liu SY, Chen CT, Liao HT. Comparison of functional outcomes and patient-reported satisfaction between titanium and absorbable plates and screws for fixation of mandibular

- fractures: A one-year prospective study. *J Cranio-Maxillofacial Surg* 2017;45:704–9. <https://doi.org/10.1016/j.jcms.2017.01.034>.
- [40] Leonhardt H, Demmrich A, Mueller A, Mai R, Loukota R, Eckelt U. INION® compared with titanium osteosynthesis: a prospective investigation of the treatment of mandibular fractures. *Br J Oral Maxillofac Surg* 2008;46:631–4. <https://doi.org/10.1016/j.bjoms.2008.04.021>.
- [41] Lim H-Y, Jung C-H, Kim S-Y, Cho J-Y, Ryu J-Y, Kim H-M. Comparison of resorbable plates and titanium plates for fixation stability of combined mandibular symphysis and angle fractures. *J Korean Assoc Oral Maxillofac Surg* 2014;40:285. <https://doi.org/10.5125/jkaoms.2014.40.6.285>.
- [42] Liu Y, Wang Y, Hu W. [Analysis of clinical efficacy and complications of titanium plate internal fixation for patients with orbital fracture]. *Int Eye Sci* 2016;16:1325–8.
- [43] Mahmoud SM, Liao H-TT, Chen C-TT. Aesthetic and Functional Outcome of Zygomatic Fractures Fixation Comparison With Resorbable Versus Titanium Plates. *Ann Plast Surg* 2016;76:S85–90. <https://doi.org/10.1097/SAP.0000000000000700>.
- [44] Menon S, Chowdhury SKR. Evaluation of bioresorbable vis-à-vis titanium plates and screws for craniofacial fractures and osteotomies. *Med J Armed Forces India* 2007;63:331–3. [https://doi.org/10.1016/S0377-1237\(07\)80008-6](https://doi.org/10.1016/S0377-1237(07)80008-6).
- [45] Menon S, Choudhury CSR. Resorbable Implants in Maxillofacial Surgery: A Reality Check. *J Maxillofac Oral Surg* 2012;11:132–7. <https://doi.org/10.1007/s12663-011-0177-1>.
- [46] Netto HD, Olate S, Rodriguez-Chesse J, Kluppel L, de Moraes M, Mazzonetto R. Selection of osteosynthesis in maxillary reconstruction with iliac crest bone graft. *Rev Kiru* 2013;10:161–5.
- [47] Obwegeser J. Osteosynthesis using biodegradable (PDS II) in Le Fort I-osteotomy without postoperative intermaxillary fixation. *J Cranio-Maxillofacial Surg* 1994;22:129–37.
- [48] Park WJ, Shin HK. A Comparative Study of the Subjective Symptoms of Bioabsorbable and Metallic Osteofixation System in Zygomatic Bone Fracture. *Arch Plast Surg* 2005;32:227–30.
- [49] C.H. P, H.S. K, J.H. L, S.M. H, Y.G. K, O.J. L, et al. Resorbable skeletal fixation systems for treating maxillofacial bone fractures. *Arch Otolaryngol - Head Neck Surg* 2011;137:125–9. <https://doi.org/10.1001/archoto.2010.241>.
- [50] Pistner H, Muehling J, Reuther J. [Absorbable materials for osteosynthesis in craniofacial surgery]. *Fortschr Kiefer Gesichtschir* 1991;36:77–9.
- [51] Qiu XD. Effects of bioabsorbable miniplate versus miniature titanium fixation system on the stability of mandibular fractures. *Chinese J Tissue Eng Res* 2015;19:6155–60. <https://doi.org/10.3969/j.issn.2095-4344.2015.38.016>.
- [52] Stuck BA, Heller T. [Implant materials for the internal fixation of midfacial fractures]. *HNO*

2011;59:1088–92. <https://doi.org/10.1007/s00106-011-2386-9>.

- [53] Sukegawa S, Kanno T, Nagano D, Shibata A, Sukegawa-Takahashi Y, Furuki Y. The Clinical Feasibility of Newly Developed Thin Flat-Type Bioresorbable Osteosynthesis Devices for the Internal Fixation of Zygomatic Fractures: Is There a Difference in Healing Between Bioresorbable Materials and Titanium Osteosynthesis? *J Craniofac Surg* 2016;27:2124–9. <https://doi.org/10.1097/SCS.0000000000003147>.
- [54] Tan W, Niu F, Yu B, Gui L. Feasibility of absorbable plates and screws for fixation in reduction malarplasty with L-shaped osteotomy. *J Craniofac Surg* 2011;22:546–50. <https://doi.org/10.1097/SCS.0b013e318208bb41>.
- [55] Tripathi N, Goyal M, Mishra B, Dhasmana S. Zygomatic complex fracture: A comparative evaluation of stability using titanium and bio-resorbable plates as one point fixation. *Natl J Maxillofac Surg* 2013;4:181. <https://doi.org/10.4103/0975-5950.127648>.
- [56] Ueki K, Miyazaki M, Okabe K, Mukozawa A, Marukawa K, Moroi A, et al. Assessment of bone healing after Le Fort I osteotomy with 3-dimensional computed tomography. *J Cranio-Maxillofacial Surg* 2011;39:237–43. <https://doi.org/10.1016/j.jcms.2010.06.008>.
- [57] Ueki K, Moroi A, Iguchi R, Kosaka A, Ikawa H, Yoshizawa K. Changes in the computed tomography (pixel) value of mandibular ramus bone and fixation screws after sagittal split ramus osteotomy. *Int J Oral Maxillofac Surg* 2015;44:1337–45. <https://doi.org/10.1016/j.ijom.2015.06.010>.
- [58] Ueki K, Yoshizawa K, Moroi A, Hotta A, Tsutsui T, Fukaya K, et al. Modified hybrid fixation using absorbable plate and screw for mandibular advancement surgery. *J Cranio-Maxillofacial Surg* 2017;45:1788–93. <https://doi.org/10.1016/j.jcms.2017.08.006>.
- [59] Wittwer G, Adeyemo WL, Yerit K, Voracek M, Turhani D, Watzinger F, et al. Complications after zygoma fracture fixation: Is there a difference between biodegradable materials and how do they compare with titanium osteosynthesis? *Oral Surgery, Oral Med Oral Pathol Oral Radiol Endodontology* 2006;101:419–25. <https://doi.org/10.1016/j.tripleo.2005.07.026>.
- [60] Wu CM, Chen YA, Liao HT, Chen C hao, Pan CH, Chen CT. Surgical treatment of isolated zygomatic fracture: Outcome comparison between titanium plate and bioabsorbable plate. *Asian J Surg* 2017;41:370–6. <https://doi.org/10.1016/j.asjsur.2017.03.003>.
- [61] Zheng C. [The use of absorbable plates in fixation of maxillofacial fractures]. *Shang Hai Kou Qiang Yi Xue* 2001;10:89–90.
- [62] Norholt SE, Pedersen TK, Jensen J. Le Fort I miniplate osteosynthesis: a randomized, prospective study comparing resorbable PLLA/PGA with titanium. *Int J Oral Maxillofac Surg* 2004;33:245–52. <https://doi.org/10.1006/ijom.2003.0505>.

- [63] Cheung LK, Chow LK, Chiu WK. A randomized controlled trial of resorbable versus titanium fixation for orthognathic surgery. *Oral Surgery, Oral Med Oral Pathol Oral Radiol Endodontology* 2004;98:386–97. <https://doi.org/10.1016/j.tripleo.2004.02.069>.
- [64] Ueki K, Nakagawa K, Marukawa K, Takazakura D, Shimada M, Takatsuka S, et al. Changes in condylar long axis and skeletal stability after bilateral sagittal split ramus osteotomy with poly-l-lactic acid or titanium plate fixation. *Int J Oral Maxillofac Surg* 2005;34:627–34. <https://doi.org/10.1016/j.ijom.2005.02.013>.
- [65] Park J, Park Y. Postoperative Stability of Fixation with Absorbables in Simultaneous Maxillomandibular Orthognathic Surgery. *Maxillofac Plast Reconstr Surg* 2010;32:126–31.
- [66] Buijs GJ, Van Bakelen NB, Jansma J, de Visscher JGAM, Hoppenreijts TJM, Bergsma JE, et al. A randomized clinical trial of biodegradable and titanium fixation systems in maxillofacial surgery. *J Dent Res* 2012;91:299–304. <https://doi.org/10.1177/0022034511434353>.
- [67] Yoshioka I, Igawa K, Nagata J, Yoshida M, Ogawa Y, Ichiki T, et al. Comparison of material-related complications after bilateral sagittal split mandibular setback surgery: Biodegradable versus titanium miniplates. *J Oral Maxillofac Surg* 2012;70:919–24. <https://doi.org/10.1016/j.joms.2011.02.136>.
- [68] van Bakelen NB, Buijs GJ, Jansma J, de Visscher JG, Hoppenreijts TJ, Bergsma JE, et al. Comparison of biodegradable and titanium fixation systems in maxillofacial surgery: a two-year multi-center randomized controlled trial. *J Dent Res* 2013;92:1100–5. <https://doi.org/10.1177/0022034513508953> [doi].
- [69] Yu S, Bloomquist D. Can resorbable screws effectively be used in fixating bilateral sagittal split osteotomies for mandibular advancement? a randomized controlled trial. *J Oral Maxillofac Surg* 2014;72:2273–7. <https://doi.org/10.1016/j.joms.2014.04.033>.
- [70] Van Bakelen NB, Vermeulen KM, Buijs GJ, Jansma J, De Visscher JGAM, Hoppenreijts TJM, et al. Cost-effectiveness of a biodegradable compared to a titanium fixation system in maxillofacial surgery: A multicenter randomized controlled trial. *PLoS One* 2015;10:1–16. <https://doi.org/10.1371/journal.pone.0130330>.
- [71] Gareb B, Van Bakelen NB, Buijs GJ, Jansma J, De Visscher JGAM, Hoppenreijts TJM, et al. Comparison of the long-term clinical performance of a biodegradable and a titanium fixation system in maxillofacial surgery: A multicenter randomized controlled trial. *PLoS One* 2017;12:1–12. <https://doi.org/10.1371/journal.pone.0177152>.
- [72] Ferretti C, Reyneke JP. Mandibular, sagittal split osteotomies fixed with biodegradable or titanium screws: A prospective, comparative study of postoperative stability. *Oral Surg Oral Med Oral Pathol Oral Radiol Endod* 2002;93:534–7. <https://doi.org/10.1067/moe.2002.124091>.
- [73] Dhol WS, Reyneke JP, Tompson B, Sándor GKB. Comparison of titanium and resorbable

- copolymer fixation after Le Fort I maxillary impaction. *Am J Orthod Dentofac Orthop* 2008;134:67–73. <https://doi.org/10.1016/j.ajodo.2006.04.049>.
- [74] Van Bakelen NB, Boermans BDA, Buijs GJ, Jansma J, Pruim GJ, Hoppenreijts TJM, et al. Comparison of the long-term skeletal stability between a biodegradable and a titanium fixation system following BSSO advancement - A cohort study based on a multicenter randomised controlled trial. *Br J Oral Maxillofac Surg* 2014;52:721–8. <https://doi.org/10.1016/j.bjoms.2014.06.014>.
- [75] Harada K, Enomoto S. Stability after surgical correction of mandibular prognathism using the sagittal split ramus osteotomy and fixation with poly-L-lactic acid (PLLA) screws. *J Oral Maxillofac Surg* 1997;55:464–9. [https://doi.org/10.1016/S0278-2391\(97\)90691-1](https://doi.org/10.1016/S0278-2391(97)90691-1).
- [76] Costa F, Robiony M, Zorzan E, Zerman N, Politi M. Stability of skeletal class III malocclusion after combined maxillary and mandibular procedures: Titanium versus resorbable plates and screws for maxillary fixation. *J Oral Maxillofac Surg* 2006;64:642–51. <https://doi.org/10.1016/j.joms.2005.11.043>.
- [77] Turvey TA, Bell RB, Phillips C, Proffit WR. Self-reinforced biodegradable screw fixation compared with titanium screw fixation in mandibular advancement. *J Oral Maxillofac Surg* 2006;64:40–6. <https://doi.org/10.1016/j.joms.2005.09.011>.
- [78] Ueki K, Marukawa K, Shimada M, Nakagawa K, Alam S, Yamamoto E. Maxillary stability following Le Fort I osteotomy in combination with sagittal split ramus osteotomy and intraoral vertical ramus osteotomy: A comparative study between titanium miniplate and poly-L-lactic acid plate. *J Oral Maxillofac Surg* 2006;64:74–80. <https://doi.org/10.1016/j.joms.2005.09.015>.
- [79] Landes C, Ballon A, Sader R. Segment stability in bimaxillary orthognathic surgery after resorbable Poly(L-lactide-co-glycolide) versus titanium osteosyntheses. *J Craniofac Surg* 2007;18:1216–29. <https://doi.org/10.1097/scs.0b013e31814b29df>.
- [80] Ueki K, Hashiba Y, Marukawa K, Okabe K, Nakagawa K, Alam S, et al. Evaluation of Bone Formation After Sagittal Split Ramus Osteotomy With Bent Plate Fixation Using Computed Tomography. *J Oral Maxillofac Surg* 2009;67:1062–8. <https://doi.org/10.1016/j.joms.2008.11.016>.
- [81] Ahn YS, Kim SG, Baik SM, Kim BO, Kim HK, Moon SY, et al. Comparative Study Between Resorbable and Nonresorbable Plates in Orthognathic Surgery. *J Oral Maxillofac Surg* 2010;68:287–92. <https://doi.org/10.1016/j.joms.2009.07.020>.
- [82] Choi B-H, Park S-W, Jang S-M, Son H-N, Park B-C, Son J-H, et al. The study of stability of absorbable internal fixation after mandibular bilateral sagittal split ramal osteotomy. *J Korean Assoc Oral Maxillofac Surg* 2010;36:255. <https://doi.org/10.5125/jkaoms.2010.36.4.255>.
- [83] Ueki K, Okabe K, Miyazaki M, Mukozawa A, Moroi A, Marukawa K, et al. Skeletal stability after

- mandibular setback surgery: Comparisons among unsintered hydroxyapatite/poly-L-lactic acid plate, poly-L-lactic acid plate, and titanium plate. *J Oral Maxillofac Surg* 2011;69:1464–8. <https://doi.org/10.1016/j.joms.2010.06.187>.
- [84] Ballon A, Laudemann K, Sader R, Landes CA. Segmental stability of resorbable P(L/DL)LA-TMC osteosynthesis versus titanium miniplates in orthognathic surgery. *J Cranio-Maxillofacial Surg* 2012;40:e408–14. <https://doi.org/10.1016/j.jcms.2012.02.014>.
- [85] Ueki K, Okabe K, Moroi A, Marukawa K, Sotobori M, Ishihara Y, et al. Maxillary stability after le Fort i osteotomy using three different plate systems. *Int J Oral Maxillofac Surg* 2012;41:942–8. <https://doi.org/10.1016/j.ijom.2012.02.023>.
- [86] Blakey GH, Rossouw E, Turvey TA, Phillips C, Proffit WR, White RP. Are bioresorbable polylactate devices comparable to titanium devices for stabilizing le Fort i advancement? *Int J Oral Maxillofac Surg* 2014;43:437–44. <https://doi.org/10.1016/j.ijom.2013.10.006>.
- [87] Lee JY, Kim YK, Yun PY, Lee NK, Kim JW, Choi JH. Evaluation of stability after orthognathic surgery with minimal orthodontic preparation: Comparison according to 3 types of fixation. *J Craniofac Surg* 2014;25:911–5. <https://doi.org/10.1097/SCS.0000000000000609>.
- [88] Ueki K, Ishihara Y, Yoshizawa K, Moroi A, Ikawa H, Iguchi R, et al. Evaluation of bone formation after sagittal split ramus osteotomy using different fixation materials. *J Cranio-Maxillofacial Surg* 2015;43:710–6. <https://doi.org/10.1016/j.jcms.2015.03.009>.
